# Supplementary material for: Chemodivergent synthesis of cis-4-hydroxyprolines from diastereomerically enriched epoxides
Source: Royal Society of Chemistry journal article supplement (doi:10.1039/d4ob01815j), 2025-01-01
Supplement: d4ob01815j1.pdf [file d4ob01815j1.pdf]

## Chemodivergent Synthesis of *cis*-4-Hydroxyprolines from Diastereomerically Enriched Epoxides

Clement DaSilva,<sup>a</sup> Grace Mauk,<sup>a</sup> Lucas Forshee,<sup>a</sup> Oliver Pope,<sup>a</sup> Mathilde Doherty,<sup>a</sup> Max Ongbongan,<sup>a</sup> Nicholas Lutz,<sup>a</sup> Zemirah Kamanya,<sup>a</sup> Kara Chris Bhatt,<sup>a</sup> Andrew Braham,<sup>a</sup> Miranda Kubek,<sup>a</sup> Summer Hawthorne,<sup>a</sup> Gonzalo Campillo-Alvarado,<sup>a</sup> Avik Bhattacharjee,<sup>b</sup> Miriam A. Bowring,<sup>a</sup> and Robert V. O'Brien.\*<sup>a</sup>

---

<sup>a</sup> *Reed College, 3203 SE Woodstock Blvd., Portland, OR, USA, 97202.*

<sup>b</sup> *York University, 4700 Keele St., Toronto, ON, Canada, M3J 1P3.*

\* Email: [obrienb@reed.edu](mailto:obrienb@reed.edu)

## Table of Contents

|      |                                                         |     |
|------|---------------------------------------------------------|-----|
| I.   | General information.....                                | S2  |
| II.  | Alkene synthesis by Ru-catalyzed alkene metathesis..... | S3  |
| III. | Epoxide synthesis.....                                  | S7  |
| IV.  | Epoxide opening.....                                    | S10 |
| V.   | NMR data.....                                           | S14 |
| VI.  | X-ray crystallographic data.....                        | S35 |
| VII. | Computational data.....                                 | S39 |

## I. General information

All compounds were fully characterized by  $^1\text{H}$  NMR,  $^{13}\text{C}$  NMR, IR, high resolution mass spectrometry (HRMS), and for enantiomerically pure products optical rotations were measured. IR spectra were collected on a Nicolet FT-IR with a diamond ATR plate. Optical rotations were measured on a Rudolph Research Analytical Autopol III polarimeter, with a 100 mm cell. Diastereomeric ratios were determined by  $^1\text{H}$  NMR, and confirmed by HPLC, using an Agilent HP-1100 chromatography system equipped with a Regis Technologies, column (Reflect C-Cellulose B). X-ray quality crystals were grown for compounds **5**, **8**, and **9** by slow evaporation from acetone. Single crystal X-ray diffraction (SCXRD) data was collected on a Rigaku XtaLAB Mini II diffractometer with a CCD area detector ( $\lambda\text{MoK}\alpha = 0.71073 \text{ \AA}$ , monochromator: graphite). The collected data was refined with CrysAlisPro through standard data reduction and background corrections. Crystals were mounted in Paratone oil on a Mitegen magnetic mount. Structure solution and refinement were performed using SHELXT and SHELXL, respectively within the Olex2 graphical user interface. The NMR spectra were recorded on a Brüker ASCEND EVO 400 (400 MHz) spectrometer. Chemical shifts ( $\delta$ ) are expressed in ppm, and  $J$  values are given in Hz, with deuterated  $\text{CDCl}_3$  as solvent. All chemicals and solvents were used as received without further purification unless otherwise stated. Solvent was purchased from Sigma and Spectrum Chemical. ( $\pm$ )-Allylglycine, L-allylglycine, D-allylglycine, the *D*-Shi catalyst (1,2,4,5-Di-*O*-isopropylidene- $\beta$ -*D*-erythro-2,3-hexodiulo-2,6-pyranose) were purchased from Ambeed. Oxone<sup>®</sup> was purchased from Oakwood. 2-Ethylbutene, 2-methyl-2-butene were purchased from TCI, America. Methylenecyclohexane, tosyl chloride, Second generation Grubbs catalyst, second generation Hoveyda-Grubbs catalyst, 1,2,3-trimethoxybenzene, tetrabutylammonium hydrogensulfate, dimethoxymethane, sodium hydroxide, thionyl chloride, triethylamine, and *m*-chloroperbenzoic acid (*m*-CPBA) were purchased from Sigma. Chloroform-*d* was purchased from Cambridge Isotopes. Column chromatography was performed on silica gel (200- 300 mesh). The residual solvent signals were used as references for  $^1\text{H}$  and  $^{13}\text{C}$  NMR spectra ( $\text{CDCl}_3$ :  $\delta\text{H} = 7.26 \text{ ppm}$ ,  $\delta\text{C} = 77.16 \text{ ppm}$ ). The following abbreviations were used to describe multiplicity: s = singlet, d = doublet, t = triplet, q = quartet, m = multiplet, br = broad. All splitting patterns were assigned based on the appearance of the multiplet, and clearly defined coupling constants. Splitting patterns that were difficult to interpret were designated as multiplet (m) or broad (br). IR spectral signals are designated strong (s), medium (m), weak (w). High resolution mass spectrometry analysis (HRMS) was performed on a Waters Synapt G2Si mass spectrometer. Analytical thin layer chromatography (TLC) was carried out on precoated silica gel plates (0.2 mm thickness). TLC plates were visualized with aqueous potassium permanganate stain.

## II. Alkene synthesis by Ru-catalyzed alkene metathesis

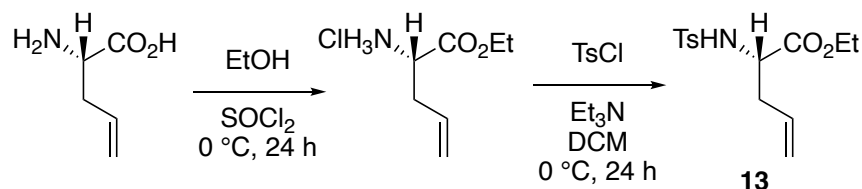

**N-tosylallylglycine ethyl ester** (Scheme S1, compound **13**), was prepared according to a modified literature procedure.<sup>1</sup> 10.0 g (86.9 mmol, 1.00 equiv) Allylglycine was dissolved in 50 mL 200 proof ethanol in a 500 mL round bottom flask equipped with a stir bar, and cooled on an ice-bath. 13.0 mL thionyl chloride (21.3g, 179 mmol, 2.05 equiv) was added dropwise, and the resulting mixture stirred overnight as it slowly warmed to room temperature. Ethanol was distilled off under reduced pressure, and the resulting white solids were redissolved in 200 mL dichloromethane in a 500 mL round bottom flask equipped with a stir bar, which was cooled on an ice-bath and treated with 33.0 g tosyl chloride (174 mmol, 2.00 equiv) and 50 mL triethylamine (36.3 g, 358 mmol, 4.12 equiv). Mixture stirred as it slowly warmed to room temperature overnight. Reaction was quenched by addition of 1M HCl<sub>(aq)</sub>, aqueous layer was extracted with dichloromethane (5 x 50 mL), organics were pooled, washed in saturated aqueous sodium bicarbonate, then water, then brine, then dried with MgSO<sub>4</sub>, filtered, and concentrated *in vacuo*. Crude product was purified by silica gel chromatography (gradient of 20% → 40% ethyl acetate/hexanes eluent), delivering 20.2 g product **13** as a yellow oil (78% isolated yield). Spectral data matched the values reported in the literature.<sup>1</sup>

Trisubstituted alkenes were prepared by Ru-catalyzed cross-metathesis following a modified literature procedure:<sup>2</sup>

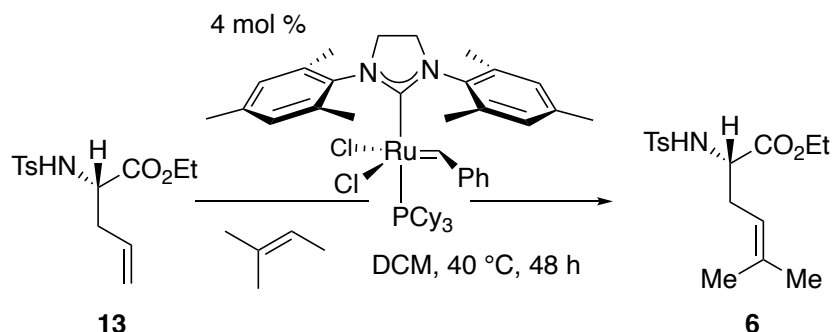

**General procedure:** 1.0 g Alkene **13** (3.71 mmol) was transferred to a 100 mL round bottom flask equipped with a stir bar. 15 mL of 2:1 anhydrous dichloromethane:2-methylbutene was added, followed by 64 mg (2 mol %) second generation Grubbs catalyst. Flask was sealed with a glass stopper, wrapped with Teflon tape, and heated at 40 °C for 24 h. An additional 64 mg catalyst was added (4 mol % total), and the reaction proceeded for an additional 24 h, at which point the mixture was concentrated *in vacuo*, yielding a brown oil. Crude product was purified

<sup>1</sup> Kotha, S.; Sreenivasachary, N. *Eur. J. Org. Chem.* **2001**, 3375-3383.

<sup>2</sup> Elaridi, J. Jackson, W. R.; Robinson, A. J. *Tetrahedron: Asymmetry* **2005**, 16, 2025-2029

by silica gel chromatography (gradient of 15% → 20% ethyl acetate/hexanes eluent), delivering 1.15 g alkene **6** as a light brown oil (95% isolated yield).

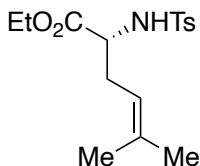

**(±)-N-tosyl-5,5-dimethylallylglycine ethyl ester (6).**  $^1\text{H}$  NMR (400 MHz,  $\text{CDCl}_3$ ):  $\delta$  7.73 (d,  $J = 8$  Hz, 2H), 7.29 (d,  $J = 4$  Hz, 2H), 5.16 (d,  $J = 8$  Hz, 1H), 3.97 (dd,  $J = 4, 8$  Hz, 1H), 3.99-3.94 (3H, m), 2.48-2.39 (5H, m), 1.68 (s, 3H), 1.58 (s, 3H), 1.14 (t,  $J = 6$  Hz, 3H);  $^{13}\text{C}$  NMR (100 MHz,  $\text{CDCl}_3$ ): 171.4, 143.7, 137.1, 136.8, 129.7, 117.0, 61.7, 55.7, 31.2, 26.0, 21.6, 18.1, 14.1; IR (neat): 3273 (w), 2978 (w), 2917 (w), 1732 (s), 1598 (w), 1495 (w), 1444 (w), 1370 (w), 1339 (m), 1305 (w), 1201 (w), 1157 (s), 1090 (m), 1020 (w), 951 (w), 854 (w), 814 (m), 744 (w), 707 (w), 661 (m)  $\text{cm}^{-1}$ ; HRMS: calcd for  $\text{C}_{16}\text{H}_{24}\text{NO}_4\text{S}$ : 326.1426, found: 326.1429 (M+H); (*R*)-enantiomer:  $[\alpha]_{\text{D}} -0.81^\circ$  ( $c = 1.31$ ,  $\text{CHCl}_3$ ); (*S*)-enantiomer:  $[\alpha]_{\text{D}} +0.17^\circ$  ( $c = 1.19$ ,  $\text{CHCl}_3$ ).

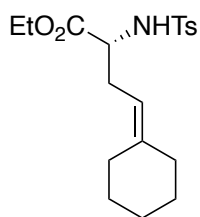

**(2*R*)-N-tosyl-2-amino-4-cyclohexylidenebutanoic acid ethyl ester (6b).** Following the general procedure (substituting methylenecyclohexane for 2-methyl-2-butene), following purification by silica gel chromatography, alkene **6b** was obtained in 70% isolated yield.  $^1\text{H}$  NMR (400 MHz,  $\text{CDCl}_3$ ):  $\delta$  7.72 (d,  $J = 8$  Hz, 2H), 7.28 (d,  $J = 4$  Hz, 2H), 5.08 (d,  $J = 12$  Hz, 1H), 4.90 (t,  $J = 8$  Hz, 1H), 3.98-3.91 (3H, m), 2.47-2.40 (5H, m), 2.06-2.01 (m, 4H), 1.55-1.45 (m, 6H, overlapping with  $\text{H}_2\text{O}$ ), 1.12 (t,  $J = 8$  Hz, 3H);  $^{13}\text{C}$  NMR (100 MHz,  $\text{CDCl}_3$ ):  $\delta$  171.1, 145.0, 143.5, 137.0, 130.0, 127.3, 113.3, 61.6, 55.7, 37.2, 31.1, 28.9, 28.5, 27.8, 26.7, 21.5, 14.0; IR (neat): 2988 (w), 2927 (m), 2853 (w), 2185 (w), 2160 (w), 1753 (s), 1598 (w), 1446 (w), 1369 (w), 1341 (m), 1305 (w), 1201 (w), 1162 (s), 1093 (w), 1020 (w), 952 (w), 853 (w), 815 (w), 707 (w), 664 (w); HRMS: calcd for  $\text{C}_{19}\text{H}_{28}\text{NO}_4\text{S}$ : 366.1739, found: 366.1738 (M+H); (*R*)-enantiomer:  $[\alpha]_{\text{D}} -0.12^\circ$  ( $c = 1.69$ ,  $\text{CHCl}_3$ ).

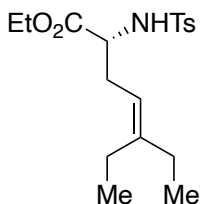

**(2*R*)-N-tosyl-5,5-diethylallylglycine ethyl ester (6c).** Following the general procedure, with the following modifications: substituting 2-ethyl-1-butene for 2-methyl-2-butene; substituting second generation Grubbs catalyst for second generation Hoveyda-Grubbs catalyst; substituting

toluene for dichloromethane; carrying out reaction at 80 °C instead of 40 °C. Following purification by silica gel chromatography, alkene **6c** was obtained in 39% isolated yield. <sup>1</sup>H NMR (400 MHz, CDCl<sub>3</sub>): δ 7.72 (d, *J* = 8 Hz, 2H), 7.27 (d, *J* = 4 Hz, 2H), 5.12 (d, *J* = 12 Hz, 1H), 4.90 (t, *J* = 8 Hz, 1H), 3.97-3.91 (3H, m), 2.50-2.39 (5H, m), 1.98 (q, *J* = 8 Hz, 4H), 1.12 (t, *J* = 8 Hz, 3H), 0.92 (q, *J* = 8 Hz, 6H); <sup>13</sup>C NMR (100 MHz, CDCl<sub>3</sub>): δ 171.3, 147.8, 143.6, 137.0, 129.6, 127.3, 114.8, 61.6, 56.7, 31.6, 29.1, 23.3, 21.5, 14.0, 13.1, 12.7; IR (neat): 3275 (br), 2965 (w), 2934 (w), 1732 (s), 1598 (w), 1444 (w), 1369 (w), 1340 (m), 1189 (w), 1157 (s), 1090 (m), 1019 (w), 919 (w), 853 (w), 813 (w), 707 (w), 661 (w), 552 (w), 429 (w) cm<sup>-1</sup>; HRMS: calcd for C<sub>18</sub>H<sub>28</sub>NO<sub>4</sub>S: 354.1739, found: 354.1734 (M+H); (*R*)-enantiomer: [α]<sub>D</sub> -0.21° (*c* = 1.22, CHCl<sub>3</sub>).

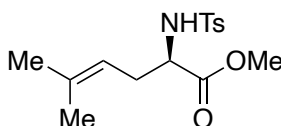

**(2*R*)-*N*-tosyl-5,5-dimethylallylglycine methyl ester (6d).** Ethyl ester **6** (1.06 g, 3.26 mmol, 1 equiv) was dissolved in 100 mL 10:1 THF:30% aqueous sodium hydroxide and stirred overnight at room temperature. 2.0 M HCl was added until pH reached 4, then the mixture was extracted with five volumes of 50 mL ethyl acetate. Organic layers were pooled, washed with brine, dried with MgSO<sub>4</sub>, filtered, and concentrated *in vacuo*. The resulting oily residue was redissolved in 50 mL methanol and cooled on an ice bath. 1.0 mL thionyl chloride (1.64 g, 13.8 mmol, 4.2 equiv) was added dropwise, and mixture stirred overnight as it slowly warmed to room temperature. Quenched by addition of saturated aqueous sodium bicarbonate, extracted with five volumes of 50 mL ethyl acetate. Organic layers were pooled, washed with brine, dried with MgSO<sub>4</sub>, filtered, and concentrated *in vacuo*. Following purification by silica gel chromatography, 582 mg alkene **6d** was obtained (57% isolated yield). <sup>1</sup>H NMR (400 MHz, CDCl<sub>3</sub>): δ 7.71 (d, *J* = 8 Hz, 2H) 7.28 (d, *J* = 8 Hz, 2H), 5.13 (d, *J* = 8 Hz, 1H), 4.93 (t, *J* = 8 Hz, 1H), 3.99-3.94 (m, 1H), 3.51 (s, 3H), 2.45-2.37 (m, 5H), 1.65 (s, 3H), 1.55 (s, 3H); <sup>13</sup>C NMR (100 MHz, CDCl<sub>3</sub>): δ 171.8, 143.7, 137.0, 129.7, 127.4, 116.9, 55.6, 52.5, 32.0, 26.0, 21.6, 18.0; IR (neat): 3267 (br), 3073 (w), 3035 (w), 2971 (w), 2952 (w), 2918 (w) 1736 (s), 1701 (w), 1671 (w), 1598 (w), 1497 (w) 1449 (m), 1442 (m), 1377 (w), 1358 (w), 1339 (s), 1321 (w), 1309 (w), 1279 (w), 1224 (w), 1199 (w), 1161 (s) 1111 (w), 1081 (s), 1018 (w), 988 (m), 950 (m), 907 (w), 863 (m), 817 (m), 801 (w), 783 (w), 726 (w), 699 (s) cm<sup>-1</sup>; HRMS: calcd for C<sub>15</sub>H<sub>22</sub>NO<sub>4</sub>S: 312.1270, found: 312.1273 (M+H); (*R*)-enantiomer: [α]<sub>D</sub> -0.23° (*c* = 14.1, CHCl<sub>3</sub>).

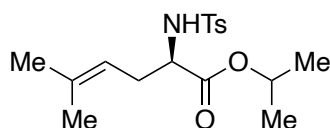

**(2*R*)-*N*-tosyl-5,5-dimethylallylglycine isopropyl ester (6e).** Ethyl ester **6** (1.06 g, 3.26 mmol, 1 equiv) was dissolved in 100 mL 10:1 THF:30% aqueous sodium hydroxide and stirred overnight at room temperature. 2.0 M HCl was added until pH reached 4, then the mixture was extracted with five volumes of 50 mL ethyl acetate. Organic layers were pooled, washed with brine, dried

with MgSO<sub>4</sub>, filtered, and concentrated *in vacuo*. The resulting oily residue was redissolved in 50 mL isopropanol and cooled on an ice bath. 1.0 mL thionyl chloride (1.64 g, 13.8 mmol, 4.2 equiv) was added dropwise, and mixture stirred overnight as it slowly warmed to room temperature. Quenched by addition of saturated aqueous sodium bicarbonate, extracted with five volumes of 50 mL ethyl acetate. Organic layers were pooled, washed with brine, dried with MgSO<sub>4</sub>, filtered, and concentrated *in vacuo*. Following purification by silica gel chromatography, 447 mg alkene **6e** was obtained (40% isolated yield). <sup>1</sup>H NMR (400 MHz, CDCl<sub>3</sub>): δ 7.71 (d, *J* = 8 Hz, 2H), 7.27 (d, *J* = 8 Hz, 2H), 5.13 (d, *J* = 12 Hz, 1H), 4.96 (t, *J* = 8 Hz, 1H), 4.81-4.72 (m, 1H), 3.93-3.88 (m, 1H), 2.45-2.36 (m, 5H), 1.66 (s, 3H), 1.57 (s, 3H), 1.11 (d, *J* = 8 Hz, 3H), 1.05 (d, *J* = 4 Hz, 3H); <sup>13</sup>C NMR (100 MHz, CDCl<sub>3</sub>): δ 171.0, 143.7, 137.1, 136.6, 129.7, 127.4, 117.1, 69.5, 55.7, 33.3, 26.0, 21.62, 21.59, 18.1; IR (neat): 3329 (br), 2973 (w), 2919 (w), 1736 (s), 1597 (w), 1496 (w), 1450 (w), 1423 (w), 1375 (w), 1352 (w), 1331 (s), 1307 (w), 1291 (w), 1276 (w), 1234 (w), 1203 (m), 1188 (w), 1156 (s), 1108 (w), 1087 (s), 1017 (w), 939 (m), 911 (w), 864 (w), 853 (w), 816 (s), 743 (m), 704 (w), 669 (s) cm<sup>-1</sup>; HRMS: calcd for C<sub>17</sub>H<sub>26</sub>NO<sub>4</sub>S: 340.1583, found: 340.1580 (M+H); (*R*)-enantiomer: [α]<sub>D</sub> -0.72° (*c* = 7.7, CHCl<sub>3</sub>).

### III. Epoxide synthesis

**(A) *m*-CPBA oxidation:** 3.42 g (10.5 mmol, 1 equiv) alkene ( $\pm$ )-**6** was combined with 150 mL dichloromethane in a 500 mL round bottom flask equipped with a stir bar, and the resulting mixture was cooled on an ice-bath. 2.6 g (15.1 mmol, 1.43 equiv) *m*-CPBA was dissolved in 50 mL dichloromethane, and the resulting solution was added dropwise to the reaction mixture. Mixture stirred as it slowly warmed to room temperature overnight. The reaction was quenched in saturated aqueous sodium thiosulfate, and the organic layer was separated in a separatory funnel. The aqueous layer was extracted 5 x 25 mL dichloromethane, and organic layers were pooled, washed in saturated aqueous sodium bicarbonate, then deionized water, then brine. The organic layer was then dried with MgSO<sub>4</sub>, filtered, and concentrated *in vacuo*. Crude product was purified by silica gel chromatography (gradient of 30%  $\rightarrow$  40% ethyl acetate/hexanes eluent), affording 9.43 g epoxide ( $\pm$ )-**7** as a yellow oil (70% yield), as a 49:51 mixture of *cis:trans* diastereomers (as determined by HPLC and <sup>1</sup>H NMR).

**(B) Shi epoxidation:** 512 mg (1.57 mmol, 1 equiv) alkene (*R*)-**6** was combined with 204 mg *D*-Shi catalyst (0.790 mmol, 50 mol %), 266 mg tetra-*n*-butylammonium hydrogensulfate (0.783 mmol, 50 mol %) in a 250 mL round bottom flask equipped with a stir bar. The mixture of solids was dissolved in 42 mL 2:1 dimethoxymethane:acetonitrile, and 28 mL borate buffer (0.05 M Na<sub>2</sub>B<sub>4</sub>O<sub>7</sub>, 0.0004 M Na<sub>2</sub>EDTA<sub>2</sub>) was added while stirring vigorously. Resulting mixture was cooled on an ice-bath, and 20 mL 0.68 M aqueous Oxone<sup>®</sup> and 20 mL 1.27 M aqueous K<sub>2</sub>CO<sub>3</sub> were added via syringe pump, at a flow rate of 20 mL/hour, over 1 hour. When the syringe pump additions were complete, the reaction was quenched in saturated aqueous sodium thiosulfate, and the organic layer was separated in a separatory funnel. The aqueous layer was extracted 5 x 25 mL ethyl acetate, and organic layers were pooled, washed in saturated aqueous sodium bicarbonate, then deionized water, then brine. The organic layer was then dried with MgSO<sub>4</sub>, filtered, and concentrated *in vacuo*. Crude product was purified by chromatography using basified silica gel<sup>3</sup> (gradient of 30%  $\rightarrow$  40% ethyl acetate/hexanes eluent), delivering 499 mg epoxide (*2R,4R*)-**7** as a yellow oil (93% yield), as a 89:11 mixture of *cis:trans* diastereomers (as determined by <sup>1</sup>H NMR).

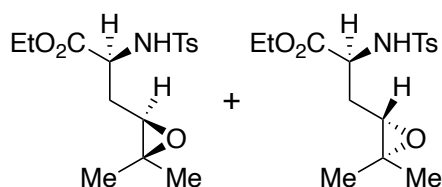

**( $\pm$ )-*N*-tosyl-4,5-epoxyhomoleucine ethyl ester (**7**).** <sup>1</sup>H NMR (400 MHz, CDCl<sub>3</sub>): (49:51 *cis:trans*)  $\delta$  7.68-7.65 (m, 4H, overlapping *cis/trans*), 7.24-7.21 (m, 4H, overlapping *cis/trans*), 5.37 (d, *J* = 8

<sup>3</sup> Silica gel was basified by flushing with 1% triethylamine/hexanes prior to equilibrating the column. All the epoxides we synthesized proved sensitive to degradation on normal silica gel, causing generation of unknown byproducts and reduction of yield. Even with basified silica some degradation still occurs, making purification more difficult than the alkene or proline compounds.



Hz, 1H, *trans*, NH), 5.23 (d,  $J = 8$  Hz, 1H, *cis*, NH), 4.06-3.87 (m, 6H, overlapping *cis/trans*), 2.78-2.70 (m, 2H, overlapping *cis/trans*), 2.35 (apparent d,  $J = 4$  Hz, 6H, overlapping *cis/trans*), 2.04 (dt,  $J = 12$ , 4 Hz, 1H, *cis*), 1.90-1.80 (m, 3H, overlapping *cis/trans*), 1.24 (s, 3H, *trans*); 1.21 (3H, s, *cis*), 1.17 (s, 6H, overlapping *cis/trans*), 1.08 (t,  $J = 8$  Hz, 3H, *trans*), 1.04 (t,  $J = 6$  Hz, 3H, *cis*);  $^{13}\text{C}$  NMR (100 MHz,  $\text{CDCl}_3$ ): (49:51 *cis:trans*)  $\delta$  171.3, 171.0, 143.94, 143.87, 136.9, 136.7, 129.9, 129.3, 127.5, 127.4, 62.3, 62.1, 60.6, 60.0, 54.2, 54.0, 33.2, 32.7, 24.71, 24.68, 21.66, 19.1, 19.0, 14.0; ; IR (neat): 3271 (w), 2980 (w), 2927 (w), 1735 (s), 1598 (w), 1495 (w), 1447 (w), 1370 (w), 1338 (m), 1305 (w), 1217 (w), 1185 (w), 1159 (s), 1119 (w), 1091 (w), 1020 (w), 895 (w), 855 (w), 814 (m), 736, 706, 661 (s)  $\text{cm}^{-1}$ ; HRMS: calcd for  $\text{C}_{16}\text{H}_{24}\text{NO}_5\text{S}$ : 342.137, found: 342.1368 (M+H).

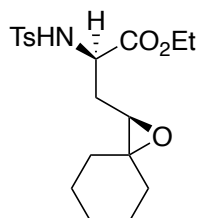

**(2R,4R)-N-tosyl-2-amino-4,5-epoxy-4-cyclohexylidenebutanoic acid ethyl ester (7b).**  $^1\text{H}$  NMR (400 MHz,  $\text{CDCl}_3$ ): (91:9 *cis:trans*)  $\delta$  7.75-7.71 (m, 2H, overlapping *cis/trans*), 7.30-7.26 (m, 2H, overlapping *cis/trans*), 5.46 (d,  $J = 8$  Hz, 1H, *trans*, NH), 5.33 (d,  $J = 12$  Hz, 1H, *cis*, NH), 4.17-4.10 (m, 1H, overlapping *cis/trans*), 4.09-3.94 (m, 2H, overlapping *cis/trans*), 2.87-2.84 (m, 1H, overlapping *cis/trans*), 2.43 (s, 3H, overlapping *cis/trans*), 1.98-1.87 (m, 2H, overlapping *cis/trans*), 1.73-1.65 (m, 2H, overlapping *cis/trans*), 1.59-1.44 (m, 8H, overlapping *cis/trans*); 1.17 (t,  $J = 6$  Hz, 3H, *trans*), 1.12 (t,  $J = 8$  Hz, 3H, *cis*);  $^{13}\text{C}$  NMR (100 MHz,  $\text{CDCl}_3$ ): (91:9 *cis:trans*)  $\delta$  171.3, 171.1, 143.9, 143.8, 136.9, 136.6, 129.9, 129.8, 127.5, 127.4, 63.0, 62.8, 60.6, 60.0, 54.2, 54.0, 33.2, 32.7, 24.71, 24.68, 21.66, 19.1, 19.0, 14.0; ; IR (neat): 3270 (w), 2857 (w), 2931 (w), 1734 (s), 1598 (w), 1494 (w), 1447 (m), 1369 (w), 1339 (w), 1289 (w), 1184 (w), 1160 (s), 1118 (w), 1091 (m), 1020 (w), 905 (w), 854 (w), 814 (m), 735 (w), 706 (w), 662 (s); HRMS: calcd for  $\text{C}_{19}\text{H}_{28}\text{NO}_5\text{S}$ : 382.1688, found: 382.1685 (M+H).

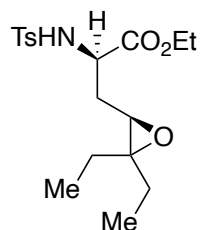

**(2R,4R)-N-tosyl-2-amino-4,5-epoxy-5-ethylheptanoic acid ethyl ester (7c).**  $^1\text{H}$  NMR (400 MHz,  $\text{CDCl}_3$ ): (88:12 *cis:trans*)  $\delta$  7.73 (d,  $J = 12$  Hz, 2H, overlapping *cis/trans*), 7.30 (d,  $J = 12$  Hz, 2H, overlapping *cis/trans*), 5.44 (d,  $J = 8$  Hz, 1H, *cis*), 5.31 (d,  $J = 8$  Hz, 1H, *trans*), 4.10-3.94 (m, 3H, overlapping *cis/trans*), 2.85-2.82 (m, 1H, overlapping *cis/trans*), 2.41 (s, 3H, overlapping *cis/trans*), 2.18-2.12 (m, 1H, overlapping *cis/trans*), 1.94-1.87 (m, 1H, overlapping *cis/trans*), 1.54-1.40 (m, 4H, overlapping *cis/trans*), 1.15 (t,  $J = 8$  Hz, 3H, overlapping *cis/trans*), 0.95 (t,  $J =$

8 Hz, 3H, overlapping *cis/trans*), 0.88 (t,  $J = 8$  Hz, 3H, overlapping *cis/trans*);  $^{13}\text{C}$  NMR (100 MHz,  $\text{CDCl}_3$ ): (88:12 *cis:trans*)  $\delta$  175.4, 143.4, 138.1, 129.3, 128.0, 79.3, 77.7, 62.1, 60.9, 36.4, 30.0, 29.3, 21.5, 13.8, 10.5, 9.9; IR (neat): 3261 (w), 2965 (w), 2939 (w), 2879 (w), 1738 (s), 1728 (w), 1597 (w), 1497 (w), 1450 (w), 1420 (w), 1370 (w), 1339 (s), 1309 (w), 1276 (w), 1215 (w), 1185 (w), 1160 (s), 1121 (w), 1086 (m), 1017 (w), 967 (w), 927 (w), 896 (w), 865 (w), 852 (w), 818 (w), 735 (w), 705 (w), 666 (s), 608 (w), 569 (w), 554 (m), 504 (w), 490 (w), 443 (w), 425 (w)  $\text{cm}^{-1}$ ; HRMS: calcd for  $\text{C}_{18}\text{H}_{28}\text{NO}_5\text{S}$ : 370.1688, found: 370.1685 (M+H).

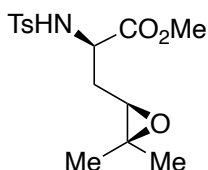

**(2R,4R)-N-tosyl-4,5-epoxyhomoleucine methyl ester (7d).**  $^1\text{H}$  NMR (400 MHz,  $\text{CDCl}_3$ ): (89:11 *cis:trans*)  $\delta$  7.73 (d,  $J = 8$  Hz, 2H, overlapping *cis/trans*), 7.29 (d,  $J = 8$  Hz, 2H, overlapping *cis/trans*), 5.40 (d,  $J = 8$  Hz, 1H, *trans*), 5.28 (d,  $J = 8$  Hz, 1H, *cis*), 4.16-4.11 (m, 1H, overlapping *cis/trans*), 4.05-4.00 (m, 1H, *trans*), 3.59 (s, 3H, *trans*), 3.53 (s, 3H, *cis*), 2.83-2.80 (m, 1H, overlapping *cis/trans*), 2.42 (s, 3H, overlapping *cis/trans*), 1.96-1.85 (2H, m, overlapping *cis/trans*), 1.29 (s, 3H, *cis*), 1.28 (s, 3H, *trans*), 1.23 (s, 3H, overlapping *cis/trans*);  $^{13}\text{C}$  NMR (100 MHz,  $\text{CDCl}_3$ ): (89:11 *cis:trans*)  $\delta$  171.8, 143.9, 136.9, 129.9, 129.8, 127.4, 60.5, 58.7, 54.2, 52.8, 33.0, 24.7, 21.7, 19.0; IR (neat): 3276 (br), 2923 (w), 2853 (w), 1741 (s), 1598 (w), 1436 (m), 1379 (w), 1337 (s), 1275 (w), 1220 (w), 1159 (s), 1120 (w), 1091 (m), 1019 (w), 952 (w), 845 (w), 841 (m), 776 (w), 706 (w), 662 (s), 575 (w), 555 (s)  $\text{cm}^{-1}$ ; HRMS: calcd for  $\text{C}_{15}\text{H}_{22}\text{NO}_5\text{S}$ : 328.1219, found: 328.1219 (M+H).

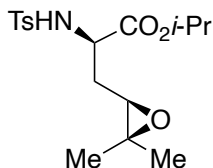

**(2R,4R)-N-tosyl-4,5-epoxyhomoleucine isopropyl ester (7e).**  $^1\text{H}$  NMR (400 MHz,  $\text{CDCl}_3$ ): (89:11 *cis:trans*)  $\delta$  7.72 (d,  $J = 8$  Hz, 2H, overlapping *cis/trans*), 7.27 (d,  $J = 8$  Hz, 2H, overlapping *cis/trans*), 5.46 (d,  $J = 8$  Hz, 1H, *trans*), 5.33 (d,  $J = 12$  Hz, 1H, *cis*), 4.81-4.74 (m, 1H, overlapping *cis/trans*), 4.06-4.00 (m, 1H, *cis*), 3.97-3.90 (m, 1H, *trans*), 2.86-2.83 (m, 1H, overlapping *cis/trans*), 2.40 (s, 3H, overlapping *cis/trans*), 1.93-1.79 (m, 2H, overlapping *cis/trans*), 1.33 (s, 3H, *trans*), 1.30 (s, 3H, *cis*), 1.28 (s, 3H, *trans*), 1.24 (s, 3H, *cis*), 1.14 (d,  $J = 8$  Hz, 3H, *trans*), 1.11 (d,  $J = 4$  Hz, 3H, *cis*), 1.07 (d,  $J = 4$  Hz, 3H, *trans*), 1.01 (d,  $J = 8$  Hz, 3H, *cis*);  $^{13}\text{C}$  NMR (100 MHz,  $\text{CDCl}_3$ ): (89:11 *cis:trans*)  $\delta$  170.8, 143.8, 136.9, 129.8, 127.5, 70.0, 60.7, 58.8, 54.3, 33.3, 24.71, 24.69, 21.6, 21.51, 19.1; IR (neat): 3289 (br), 2981 (w), 2928 (w), 2878 (w), 1735 (s), 1597 (w), 1496 (w), 1442 (w), 1422 (w), 1402 (w), 1374 (w), 1357 (w), 1331 (s), 1307 (w), 1283 (w), 1214 (m), 1185 (w), 1192 (w), 1160 (s), 1139 (w), 1111 (s), 1088 (s), 1045 (w), 1016 (m), 943 (m), 915 (w), 893 (w), 858 (m), 816 (s), 800 (w), 784 (m), 736 (m), 683 (w), 668 (s), 633 (w)  $\text{cm}^{-1}$ ; HRMS: calcd for  $\text{C}_{17}\text{H}_{26}\text{NO}_5\text{S}$ : 356.1532, found: 356.1530 (M+H).

#### IV. Epoxide opening

- A.** A 20 mL scintillation vial was charged with 48.6 mg (0.142 mmol, 1 equiv) epoxide *cis-7* and equipped with a stir bar. Anhydrous dichloromethane (5 mL) was added and mixture was cooled on an ice-bath. 10  $\mu$ L (17 mg, 0.11 mmol, 75 mol %) trifluoromethanesulfonic acid was added via syringe and the mixture stirred for 1 hour. Mixture was filtered through a plug of anhydrous  $K_2CO_3$ , plug was washed in 5 x 2 mL dichloromethane, and solution was concentrated *in vacuo*. Percent conversion was assayed by  $^1H$  NMR using 1,2,3-trimethoxybenzene as an internal standard in  $CDCl_3$ . Crude product was purified by silica gel chromatography (gradient of 20%  $\rightarrow$  30% ethyl acetate/hexanes eluent), and 26.1 mg proline **5** was obtained as a white solid residue (54% yield).
- B.** A 20 mL scintillation vial was charged with 50.3 mg (0.147 mmol, 1 equiv) epoxide *cis-7* inside a glovebox. Anhydrous dichloromethane (5 mL) was added and mixture was transferred via syringe to a second 20 mL scintillation vial containing 5.0 mg (0.014 mmol, 10 mol %)  $InBr_3$  and 500 mg 4  $\text{\AA}$  molecular sieves (which were dried in the oven at 150  $^\circ C$  for 24 hours and cooled under vacuum prior to use). Vial was equipped with a stir bar, and mixture stirred for 3 hours at room temperature, and was then removed from the glovebox and filtered through a plug of Celite. Plug was washed in 5 x 2 mL dichloromethane, and solution was concentrated *in vacuo*. Percent conversion was assayed by  $^1H$  NMR using 1,2,3-trimethoxybenzene as an internal standard in  $CDCl_3$ . Crude product was purified by silica gel chromatography (gradient of 20%  $\rightarrow$  30% ethyl acetate/hexanes eluent), and 20.3 mg proline **5** was obtained as a white solid residue (40% yield).
- C.** A 20 mL scintillation vial was charged with 22.4 mg (0.0656 mmol, 1 equiv) epoxide *trans-7*, and vial was equipped with a stir bar. Anhydrous dichloromethane (5 mL) was added and mixture was transferred via syringe to a second 20 mL scintillation vial containing 3.6 mg (0.0064 mmol, 10 mol %)  $In(OTf)_3$ . Mixture stirred for 24 hours at room temperature, and was then filtered through a plug of Celite. Plug was washed in 5 x 2 mL dichloromethane, and solution was concentrated *in vacuo*. Percent conversion was assayed by  $^1H$  NMR using 1,2,3-trimethoxybenzene as an internal standard in  $CDCl_3$ . Crude product was purified by silica gel chromatography (gradient of 20%  $\rightarrow$  30%  $\rightarrow$  40% ethyl acetate/hexanes eluent), and 20.3 mg proline **5** was obtained as a white solid residue (38% yield).

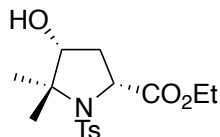

**(2*R*,4*R*)-*N*-tosyl-4-hydroxy-5,5-dimethylproline ethyl ester (5).** <sup>1</sup>H NMR (400 MHz, CDCl<sub>3</sub>):  $\delta$  7.78 (d,  $J$  = 8 Hz, 2H), 7.27 (d,  $J$  = 8 Hz, 2H), 4.46 (dd,  $J$  = 8 Hz, 2 Hz, 1H), 4.14-4.03 (m, 2H), 3.74-3.67 (m, 2H), 2.57-2.50 (m, 1H), 2.41 (s, 3H), 1.88 (d,  $J$  = 12 Hz, 1H), 1.51 (s, 3H), 1.33 (s, 3H), 1.24 (t,  $J$  = 8 Hz, 3H); <sup>13</sup>C NMR (100 MHz, CDCl<sub>3</sub>):  $\delta$  175.3, 143.7, 138.3, 129.51, 129.47, 128.1, 127.8, 80.6, 71.0, 62.3, 60.3, 34.9, 26.4, 23.1, 21.7, 14.0; IR (neat): 3529 (m), 2987 (w), 2924 (w), 1757 (s), 1596 (w), 1497 (w), 1449 (w), 1326 (s), 1308 (w), 1245 (w), 1231 (w), 1210 (w), 1147 (w), 1132 (s), 1098 (w), 1075 (w), 1040 (w), 1026 (w), 1013 (w), 983 (w), 931 (w), 867 (w), 855 (w), 817 (m), 714 (m), 676 (m), 652 (m) cm<sup>-1</sup>; HRMS: calcd for C<sub>16</sub>H<sub>24</sub>NO<sub>5</sub>S: 342.1375, found: 342.1378 (M+H); (2*R*,4*R*)-enantiomer:  $[\alpha]_D$  -0.96° ( $c$  = 1.45, CHCl<sub>3</sub>).

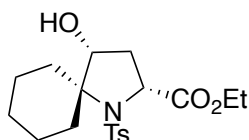

**Ethyl (2*R*,4*R*)-*N*-tosyl-4-hydroxy-1-azaspiro[4.5]decane-2-carboxylate (10).** <sup>1</sup>H NMR (400 MHz, CDCl<sub>3</sub>):  $\delta$  7.78 (d,  $J$  = 8 Hz, 2H), 7.26 (d,  $J$  = 8 Hz, 2H), 4.49 (dd,  $J$  = 4, 12 Hz, 1H); 4.30 (d,  $J$  = 4 Hz, 1H), 4.11-3.96 (2H, m), 2.53-2.44 (m, 1H), 2.41 (s, 3H), 2.34-2.26 (m, 1H), 2.22-2.14 (m, 1H), 2.11-2.06 (m, 1H), 1.89 (d,  $J$  = 16 Hz, 1H), 1.73-1.62 (m, 3H), 1.47-1.25 (m, 4H), 1.22 (t,  $J$  = 8 Hz, 3H); <sup>13</sup>C NMR (100 MHz, CDCl<sub>3</sub>):  $\delta$  175.5, 143.4, 138.7, 129.3, 127.9, 76.0, 74.2, 62.2, 60.1, 35.0, 34.5, 31.7, 25.0, 24.8, 24.4, 21.5, 13.9; IR (neat): 3445 (br), 2935 (w), 2866 (w), 1721 (s), 1598 (w), 1449 (w), 1379 (w), 1329 (w), 1265 (m), 1208 (w), 1155 (s), 1113 (w), 1093 (w), 1065 (w), 1002 (w), 950 (w), 094 (w), 816 (w), 732 (s), 702 (w), 670 (w), 642 (w) cm<sup>-1</sup>; HRMS: calcd for C<sub>19</sub>H<sub>28</sub>NO<sub>5</sub>S: 382.1688, found: 382.1690 (M+H); (2*R*,4*R*)-enantiomer:  $[\alpha]_D$  -0.22° ( $c$  = 1.31, CHCl<sub>3</sub>).

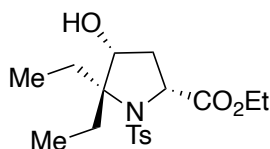

**(2*R*,4*R*)-*N*-tosyl-4-hydroxy-5,5-diethylproline ethyl ester (11).** <sup>1</sup>H NMR (400 MHz, CDCl<sub>3</sub>):  $\delta$  7.76 (d,  $J$  = 8 Hz, 2H), 7.27 (d,  $J$  = 8 Hz, 2H), 4.43 (dd,  $J$  = 2, 8 Hz, 1H); 4.08-3.92 (2H, m), 3.83 (d,  $J$  = 12 Hz, 1H), 2.61-2.43 (m, 1H), 2.41 (s, 3H), 2.33-2.24 (m, 1H), 2.06-1.99 (m, 1H), 1.96-1.83 (m, 3H), 1.22 (t,  $J$  = 8 Hz, 3H), 1.07 (t,  $J$  = 8 Hz, 3H), 0.86 (t,  $J$  = 8 Hz, 3H); <sup>13</sup>C NMR (100 MHz, CDCl<sub>3</sub>):  $\delta$  175.4, 143.4, 138.1, 129.3, 127.9, 79.3, 77.7, 62.1, 60.9, 36.4, 30.0, 29.3, 21.5, 13.8, 10.5, 9.9; IR (neat): 3463 (br), 2975 (w), 1720 (s), 1598 (w), 1495 (w), 1446 (w), 1378 (w), 1331 (w), 1304 (w), 1266 (w), 1210 (w), 1154 (s), 1092 (m), 1052 (w), 1021 (w), 1004 (w), 925 (w), 816 (w), 733

(s), 703 (w), 668 (m), 599 (w), 580 (m), 546 (m)  $\text{cm}^{-1}$ ; HRMS: calcd for  $\text{C}_{18}\text{H}_{28}\text{NO}_5\text{S}$ : 370.1688, found: 370.1687 (M+H); (2*R*,4*R*)-enantiomer:  $[\alpha]_{\text{D}} -0.12^\circ$  ( $c = 1.99$ ,  $\text{CHCl}_3$ ).

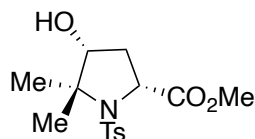

**(2*R*,4*R*)-*N*-tosyl-4-hydroxy-5,5-dimethylproline methyl ester (12).**  $^1\text{H}$  NMR (400 MHz,  $\text{CDCl}_3$ ):  $\delta$  7.78 (d,  $J = 8$  Hz, 2H), 7.28 (d,  $J = 8$  Hz, 2H), 4.49 (d,  $J = 8$  Hz, 1H), 3.76-3.72 (m, 1H), 3.66 (s, 3H), 3.58 (d,  $J = 12$  Hz, 1H), 2.57-2.50 (m, 1H), 2.42 (s, 3H), 1.89 (d,  $J = 16$  Hz, 1H), 1.51 (s, 3H), 1.33 (s, 3H);  $^{13}\text{C}$  NMR (100 MHz,  $\text{CDCl}_3$ ):  $\delta$  175.7, 143.7, 138.2, 129.5, 128.1, 80.6, 71.0, 60.1, 53.1, 34.9, 26.4, 23.1, 21.6; IR (neat): 3527 (br), 2993 (w), 2950 (w), 2928 (w), 1766 (s), 1727 (w), 1596 (m), 1497 (w), 1439 (m), 1410 (w), 1387 (w), 1369 (w), 1327 (s), 1308 (w), 1289 (w), 1265 (w), 1246 (w), 1197 (m), 1135 (s), 1095 (m), 1073 (m), 1043 (w), 1025 (w), 1012 (w), 985 (w), 942 (w), 902 (m), 865 (w), 820 (s), 806 (w), 735 (w), 718 (m), 672 (m), 654 (m), 636 (w)  $\text{cm}^{-1}$ ; HRMS: calcd for  $\text{C}_{15}\text{H}_{22}\text{NO}_5\text{S}$ : 328.1219, found: 328.1216 (M+H); (2*R*,4*R*)-enantiomer:  $[\alpha]_{\text{D}} +0.20^\circ$  ( $c = 0.99$ ,  $\text{CHCl}_3$ ).

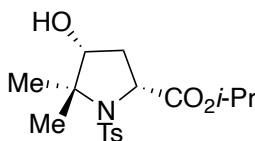

**(2*R*,4*R*)-*N*-tosyl-4-hydroxy-5,5-dimethylproline isopropyl ester (13).**  $^1\text{H}$  NMR (400 MHz,  $\text{CDCl}_3$ ):  $\delta$  7.79 (d,  $J = 8$  Hz, 2H), 7.27 (d,  $J = 8$  Hz, 2H), 4.95-4.89 (m, 1H), 4.43 (d,  $J = 12$  Hz, 1H), 3.75-3.72 (m, 1H), 3.71-3.65 (m, 1H), 2.56-2.49 (m, 1H), 2.41 (s, 3H), 1.86 (d,  $J = 16$  Hz, 1H), 1.51 (s, 3H), 1.32 (s, 3H), 1.25 (d,  $J = 8$  Hz, 3H), 1.22 (d,  $J = 8$  Hz, 3H);  $^{13}\text{C}$  NMR (100 MHz,  $\text{CDCl}_3$ ):  $\delta$  174.9, 143.7, 138.4, 129.6, 128.1, 80.7, 71.0, 70.3, 60.5, 35.0, 26.4, 23.2, 21.7, 21.6; IR (neat): 3469 (br), 2983 (w), 2937 (w), 1719 (s), 1599 (w), 1496 (w), 1456 (w), 1375 (w), 1331 (m), 1265 (m), 1219 (m), 1175 (w), 1152 (s), 1104 (w), 1092 (m), 1073 (w), 1050 (w), 1021 (w), 1009 (w), 990 (w), 935 (w), 903 (w), 864 (w), 835 (w), 815 (w), 802 (w), 733 (s), 703 (w), 673 (m), 659 (w)  $\text{cm}^{-1}$ ; HRMS: calcd for  $\text{C}_{17}\text{H}_{26}\text{NO}_5\text{S}$ : 356.1532, found: 356.1530 (M+H); (2*R*,4*R*)-enantiomer:  $[\alpha]_{\text{D}} +0.11^\circ$  ( $c = 1.24$ ,  $\text{CHCl}_3$ ).

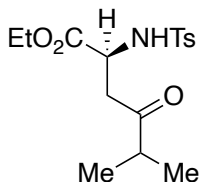

**(2*S*)-*N*-tosyl-4-oxo-homoleucine (9).**  $^1\text{H}$  NMR (400 MHz,  $\text{CDCl}_3$ ):  $\delta$  7.74 (d,  $J = 8$  Hz, 2H), 7.29 (d,  $J = 8$  Hz, 2H), 5.61 (d,  $J = 8$  Hz, 1H), 4.07-3.97 (m, 3H), 3.10 (ddd,  $J = 28$  Hz, 18 Hz, 4 Hz, 2H), 2.57-

2.50 (m, 1H), 2.41 (s, 3H), 1.25-1.06 (m, 9H);  $^{13}\text{C}$  NMR (100 MHz,  $\text{CDCl}_3$ ):  $\delta$  211.9, 170.4, 143.7, 137.0, 129.8, 127.4, 62.1, 51.9, 43.6, 40.8, 21.7, 18.1, 14.0; IR (neat): 3282 (m), 2973 (w), 2933 (w), 1732 (s), 1709 (m), 1598 (w), 1496 (w), 1445 (w), 1427 (w), 1383 (w), 1340 (w), 1306 (w), 1272 (w), 1225 (w), 1209 (w), 1187 (w), 1165 (w), 1122 (w), 1089 (w), 1060 (w), 1027 (w), 1004 (w), 939 (w), 818 (w), 748 (w), 706 (w), 681 (w), 661 (w)  $\text{cm}^{-1}$ ; HRMS: calcd for  $\text{C}_{16}\text{H}_{24}\text{NO}_5\text{S}$ : 342.1375, found: 342.1375 (M+H); (*R*)-enantiomer:  $[\alpha]_{\text{D}} -0.29^\circ$  ( $c = 0.77$ ,  $\text{CHCl}_3$ ).

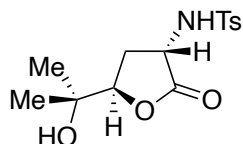

**(2*S*,4*R*)-*N*-tosyl-2-amino-5-hydroxy-5-methyl-4-hexanolide (8).**  $^1\text{H}$  NMR (400 MHz,  $\text{CDCl}_3$ ):  $\delta$  7.17 (d, ,  $J = 8$  Hz, 2H), 7.34 (d, ,  $J = 8$  Hz, 2H), 4.98 (d,  $J = 4$  Hz, 1H), 4.32 (dd,  $J = 2, 8$  Hz, 1H), 4.16 (td,  $J = 2, 8$  Hz, 1H), 2.83-2.77 (m, 1H), 2.44 (s, 3H), 2.38-2.30 (m, 1H), 1.31 (s, 3H), 1.24 (s, 3H);  $^{13}\text{C}$  NMR (100 MHz,  $\text{CDCl}_3$ ):  $\delta$  174.8, 144.4, 135.8, 130.1, 127.5, 127.4, 84.5, 72.1, 51.7, 31.5, 26.7, 25.9, 21.7; IR (neat): 3523 (br), 3241 (m), 2965 (w), 2920 (w), 1753 (s), 1599 (w), 1458 (w), 1371 (w), 1351 (w), 1327 (m), 1307 (w), 1260 (w), 1213 (w), 1184 (w), 1150 (m), 1124 (m), 1092 (w), 1057 (w), 1022 (w), 1006 (w), 985 (w), 954 (w), 909 (w), 864 (w), 846 (w), 821 (w), 803 (w), 780 (w), 740 (w), 698 (w), 664 (w), 617 (w), 562 (w), 541 (w), 433 (w), 426 (w), 419 (w)  $\text{cm}^{-1}$ ; HRMS: calcd for  $\text{C}_{14}\text{H}_{20}\text{NO}_5\text{S}$ : 314.062, found: 314.1059 (M+H); (*2R*,4*S*)-enantiomer:  $[\alpha]_{\text{D}} +0.09^\circ$  ( $c = 0.46$ ,  $\text{CHCl}_3$ ).

**V. <sup>1</sup>H and <sup>13</sup>C NMR data**  
 (±)-*N*-tosyl-5,5-dimethylallylglycine ethyl ester (**6**).

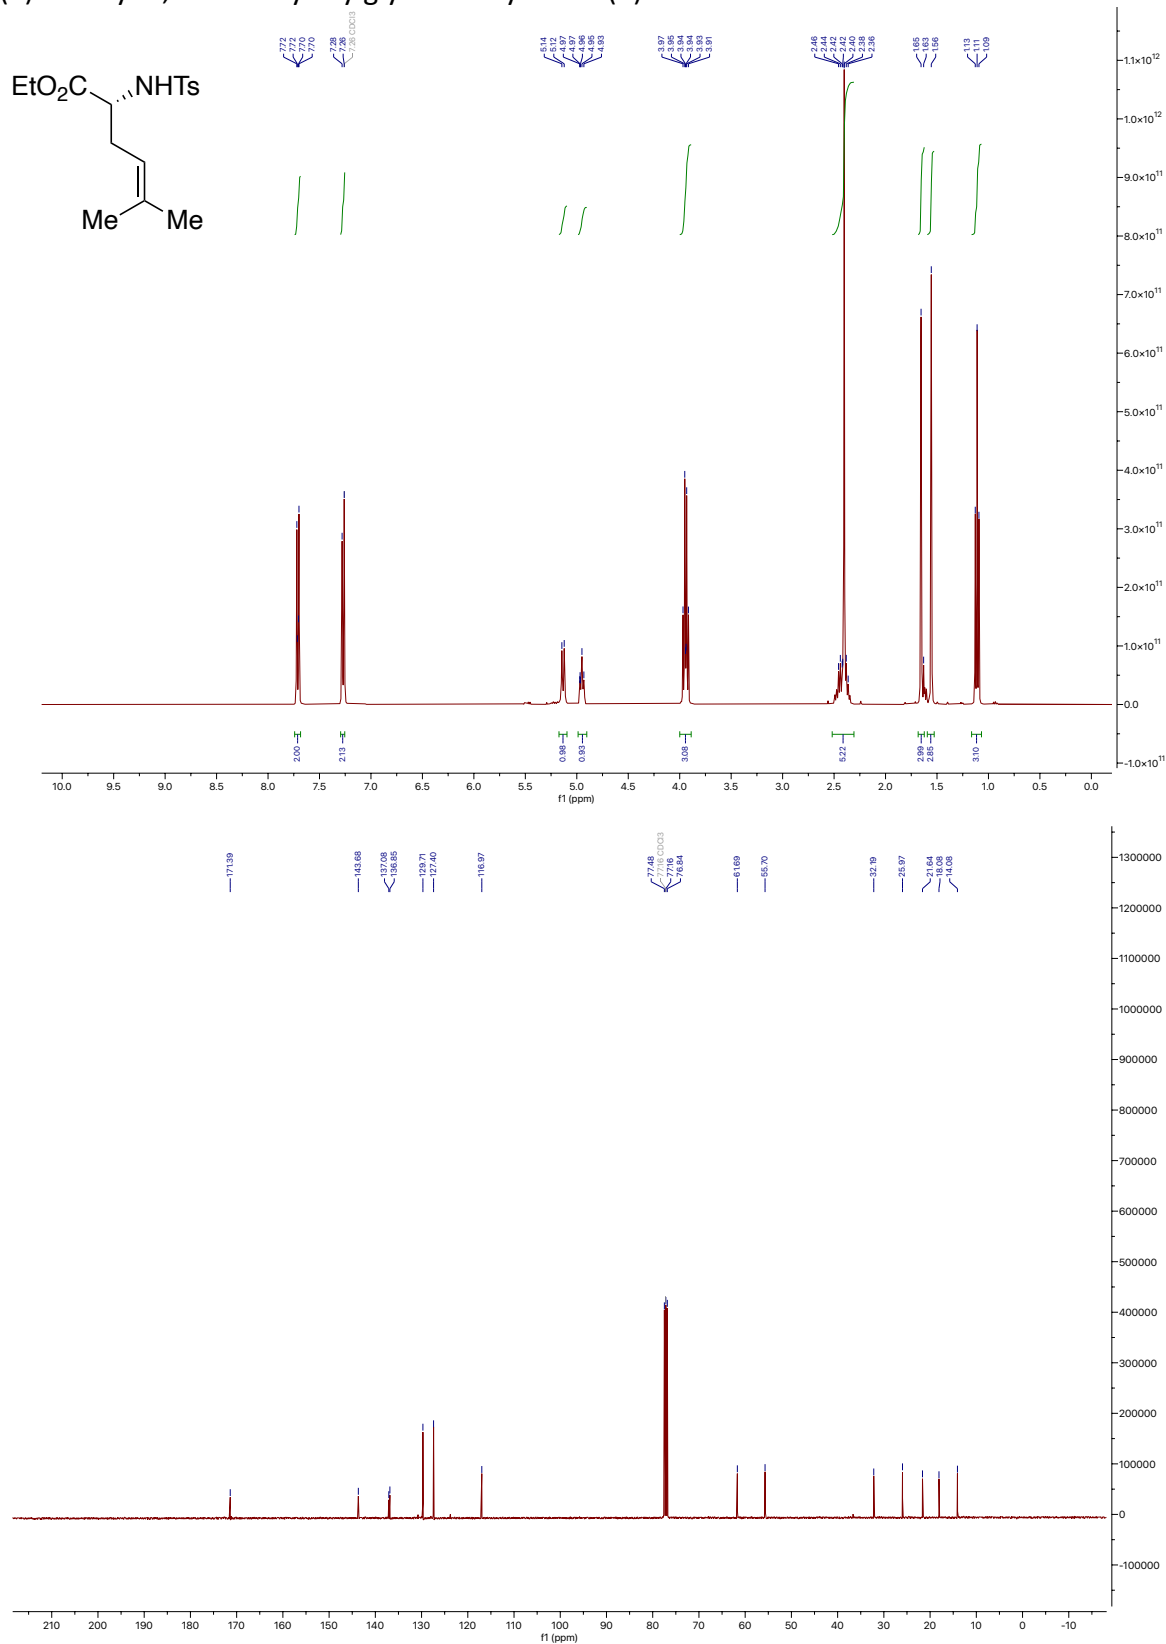

(2R)-N-tosyl-2-amino-4-cyclohexylidenebutanoic acid ethyl ester (**6b**).

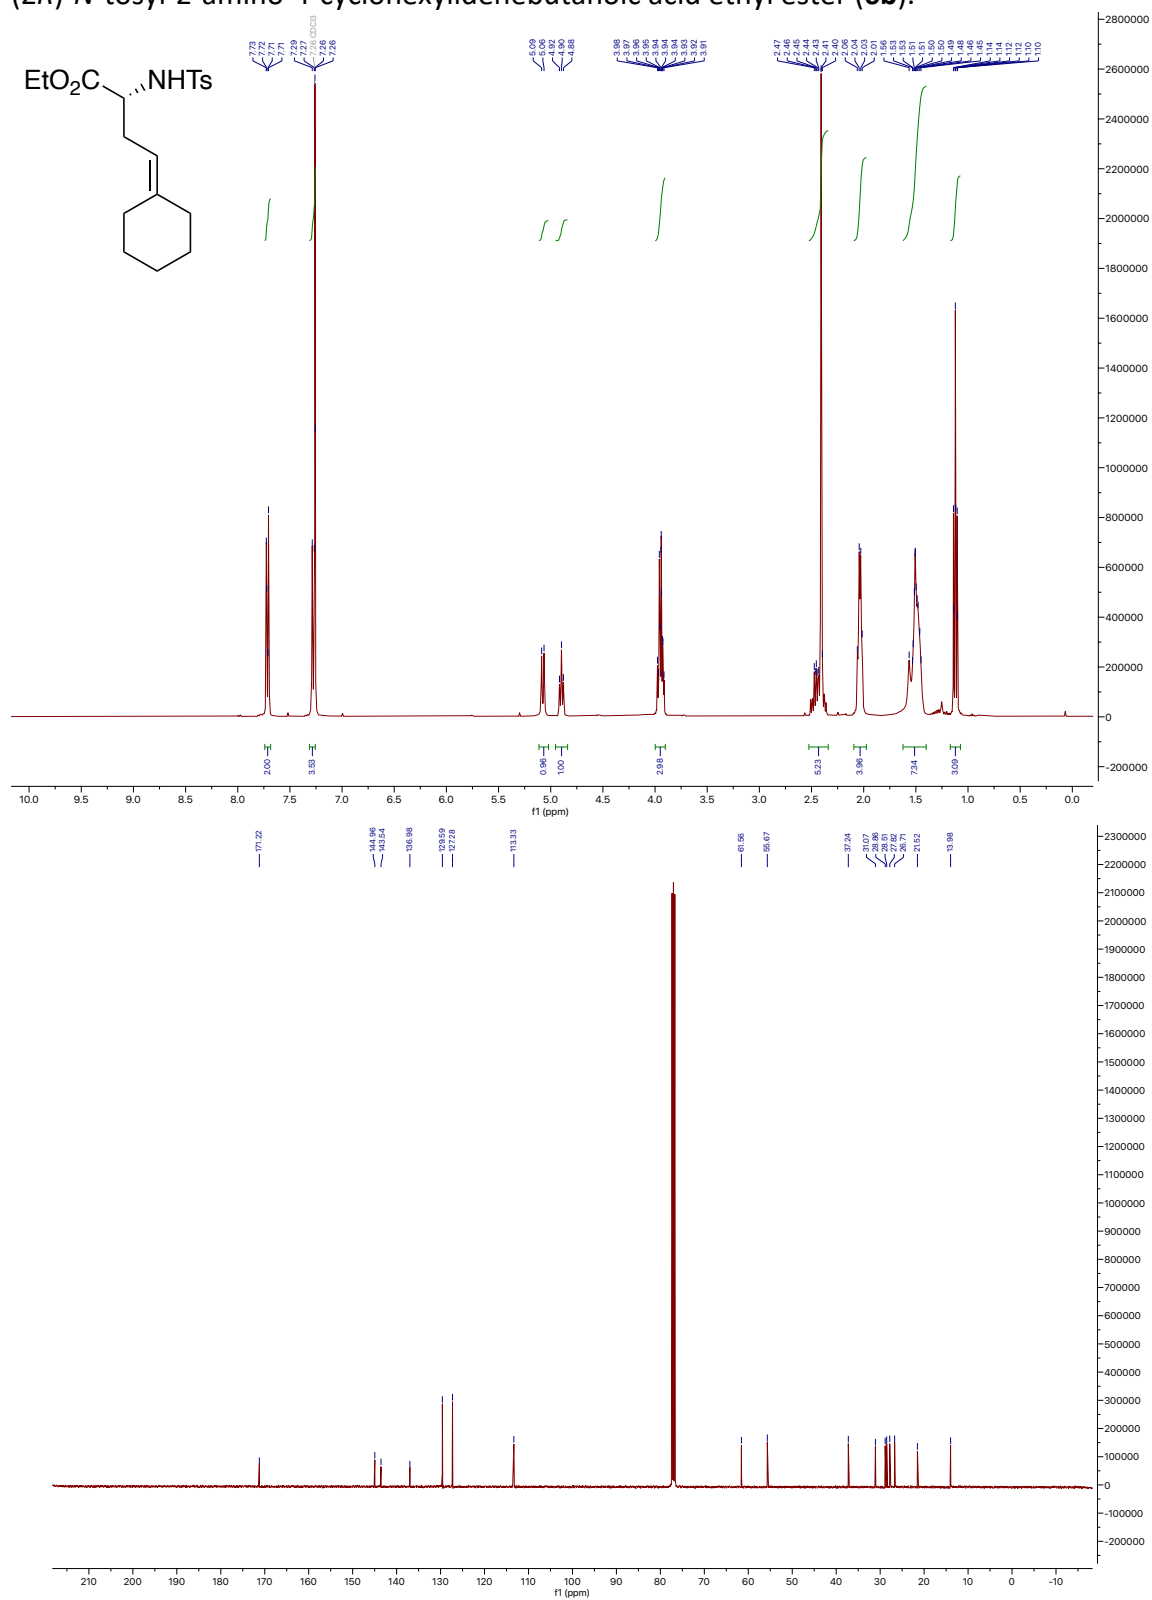



(2R)-N-tosyl-2-amino-4-cyclohexylidenebutanoic acid ethyl ester (**6c**).

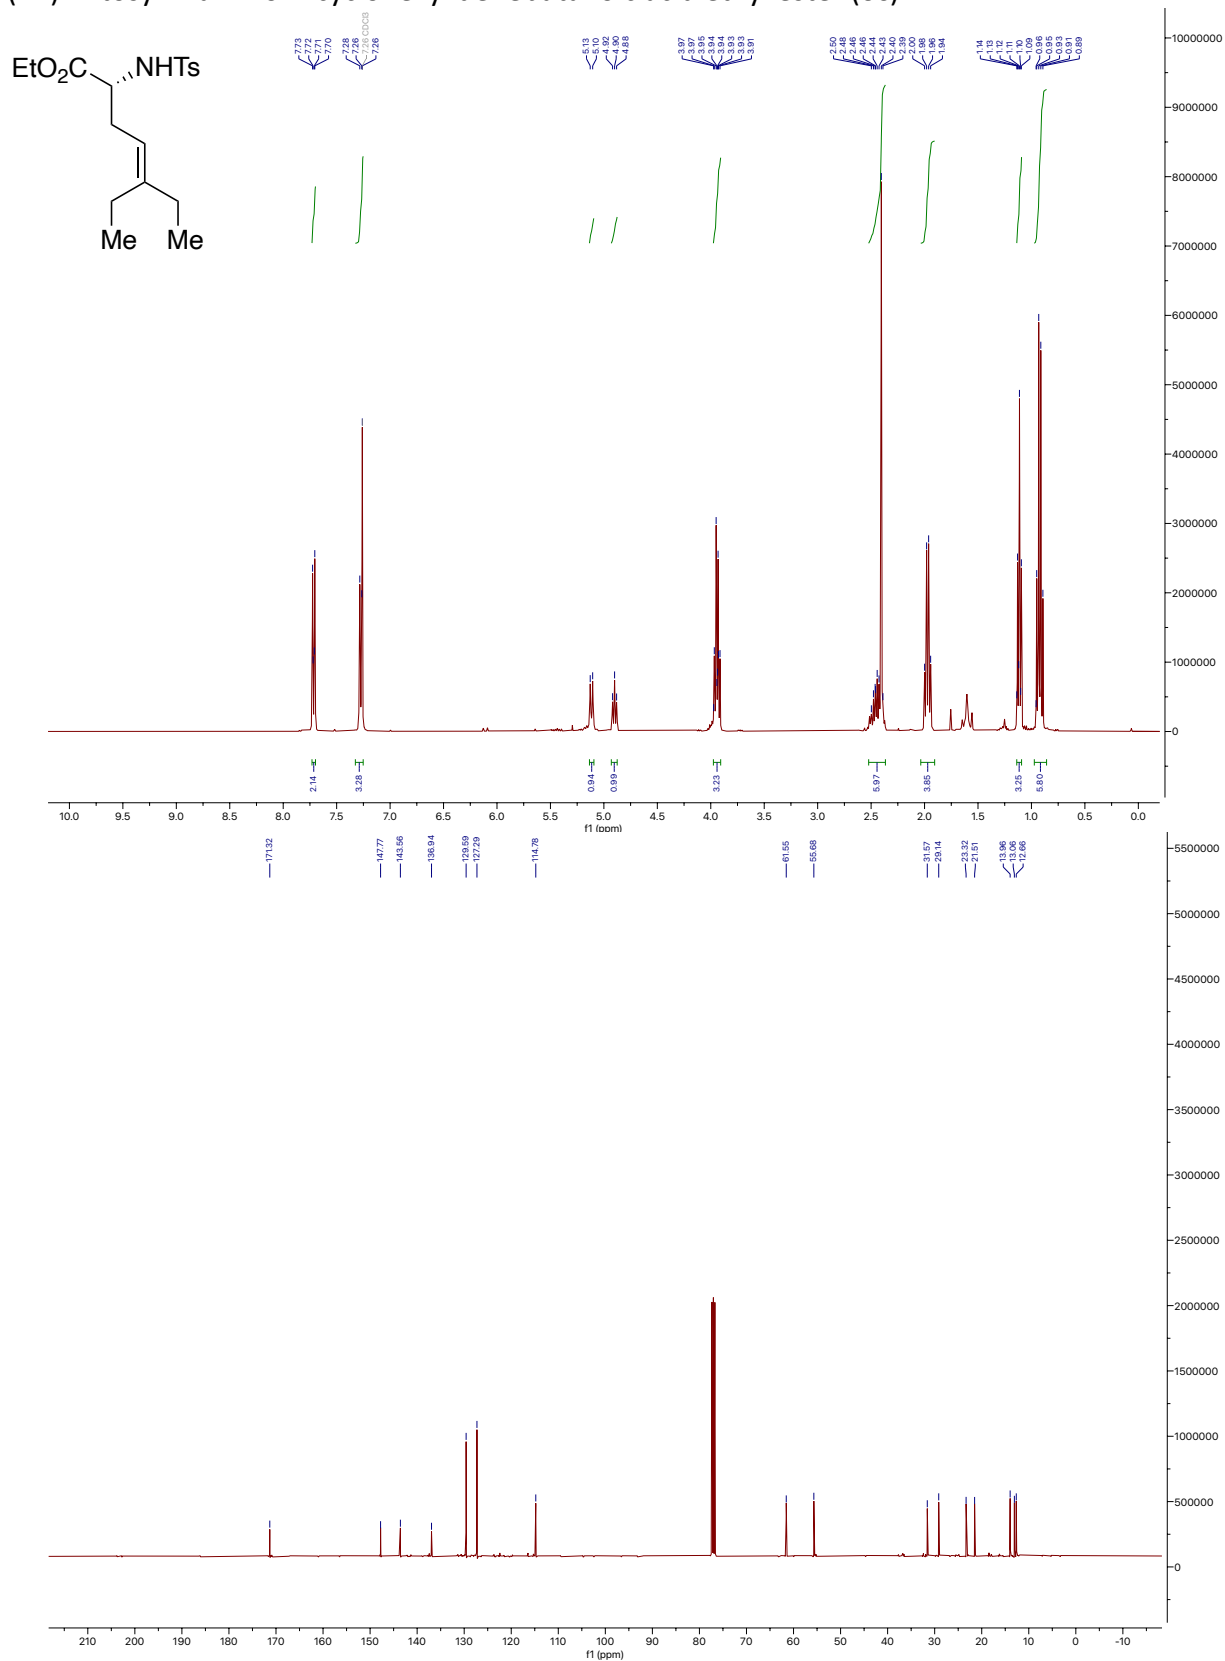

(2R)-N-tosyl-5,5-dimethylallylglycine methyl ester (**6d**).

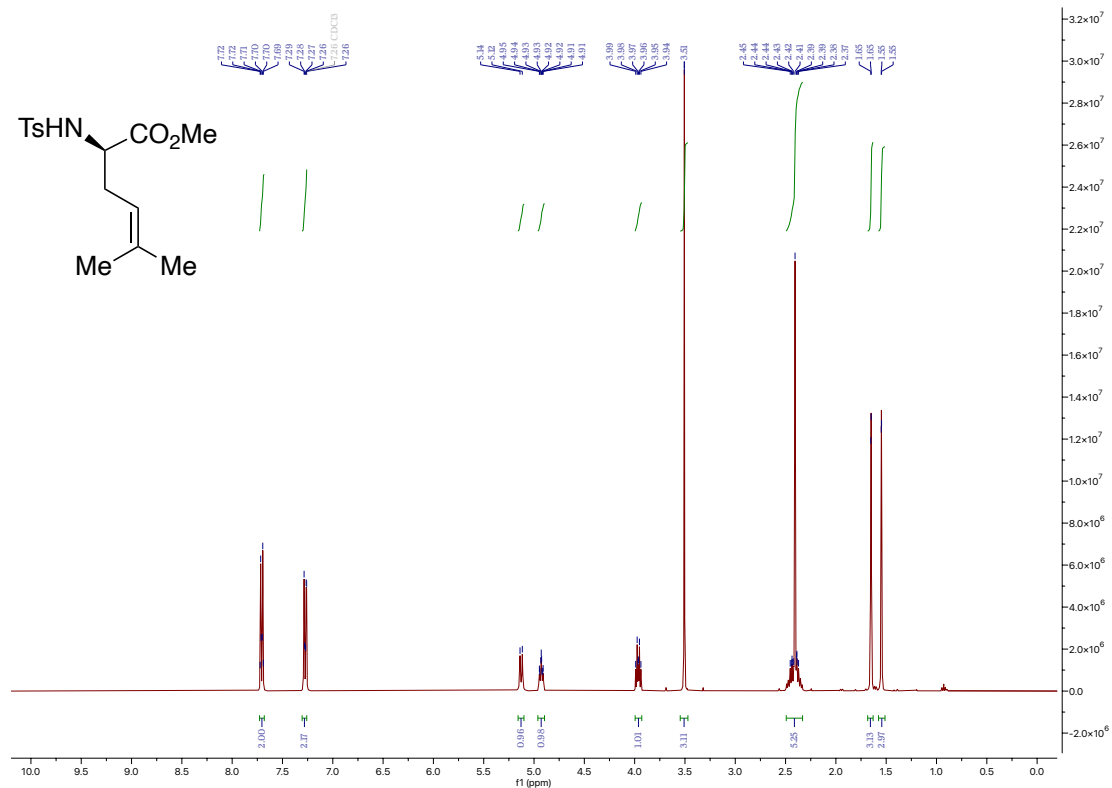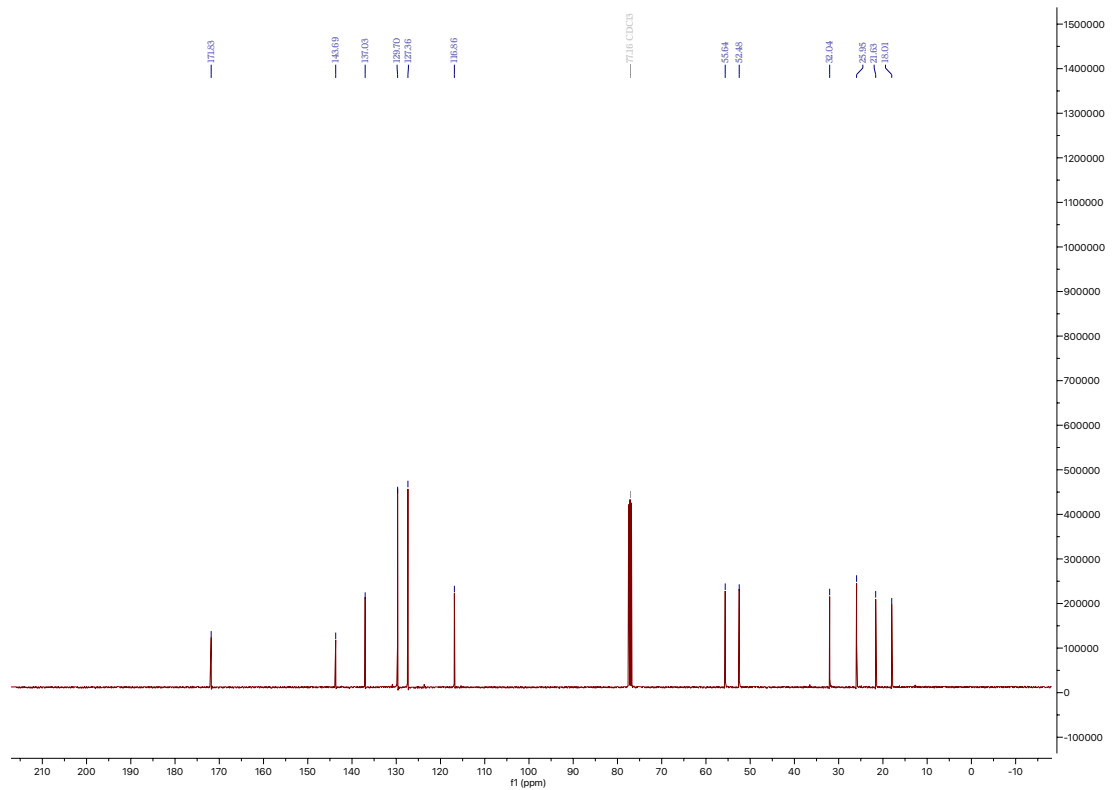

(2R)-N-tosyl-5,5-dimethylallylglycine isopropyl ester (6e).

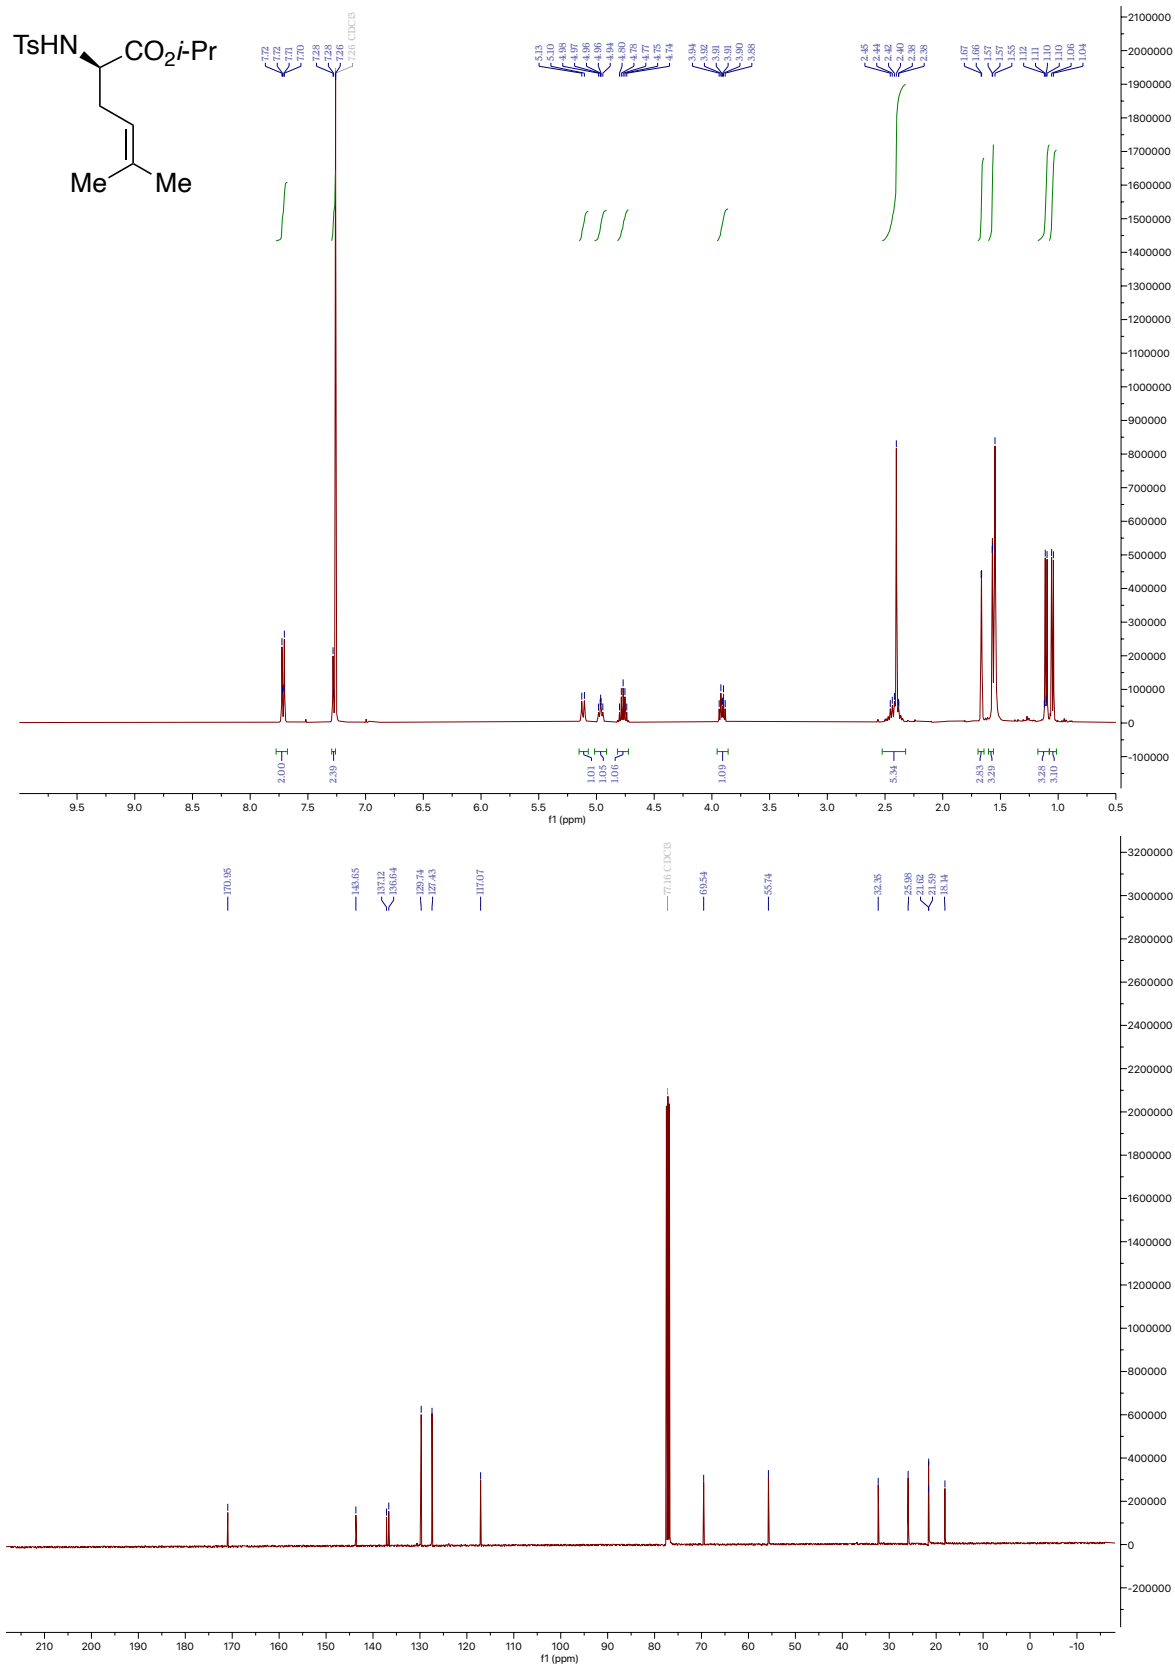

(±)-N-tosyl-4,5-epoxyhomoleucine ethyl ester (**7**). (49:51 *cis:trans*)

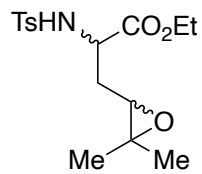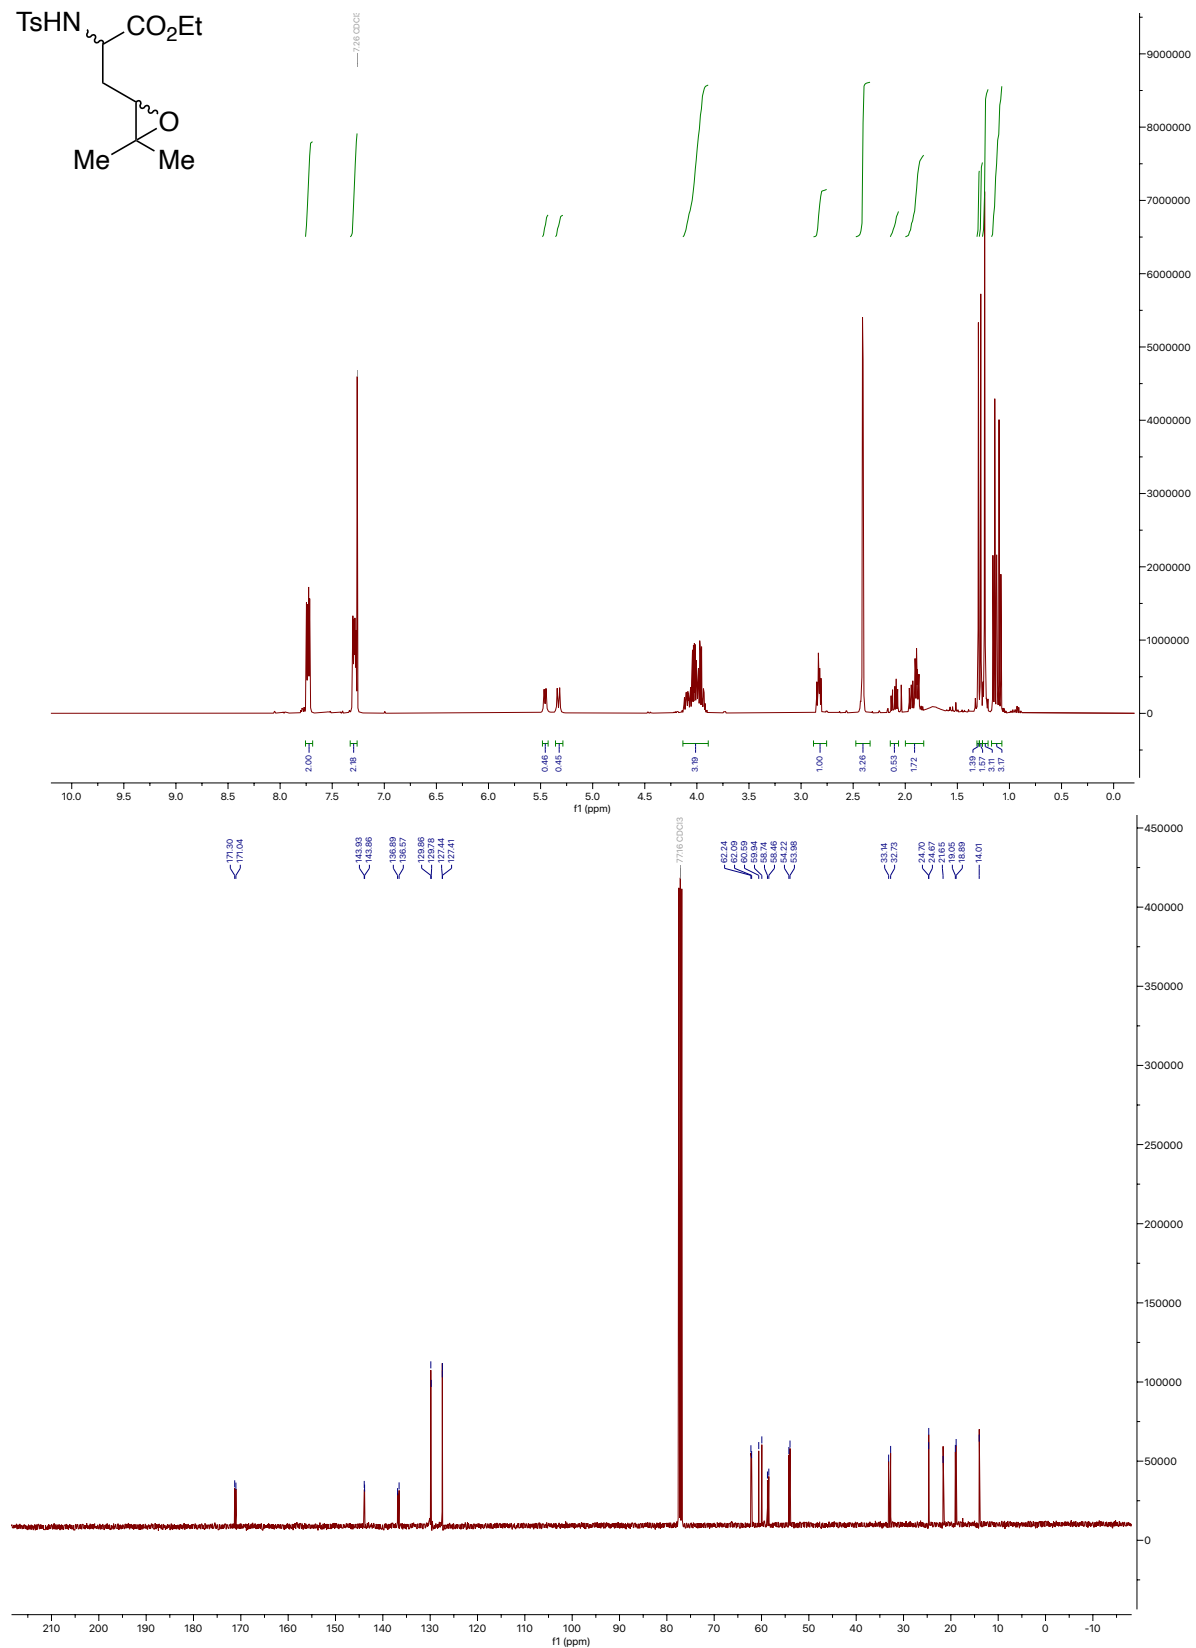

HPLC DATA: Reflect C-Cellulose B column, 98:2 hexanes:ethanol, 230 nm, 0.25 mL/min

(±)-*N*-tosyl-4,5-epoxyhomoleucine ethyl ester (**7**). (48:52 *cis:trans*) by HPLC:

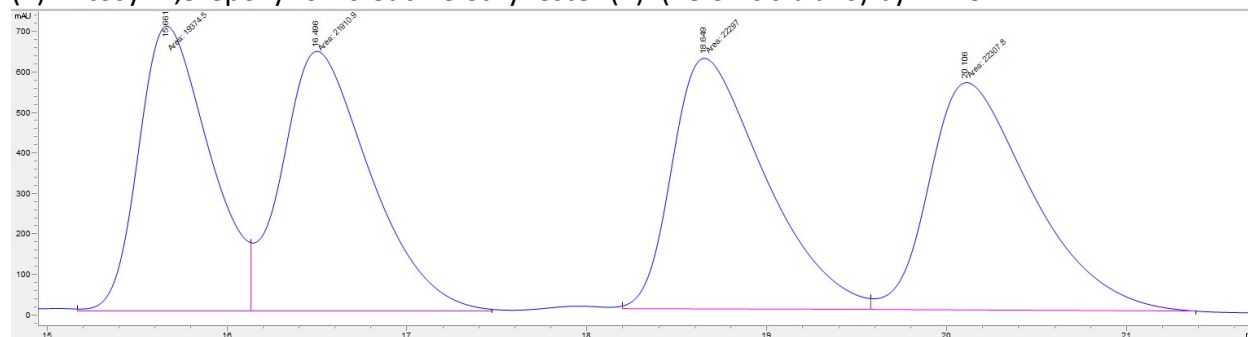

| Peak (min)                                      | retention time | integration |
|-------------------------------------------------|----------------|-------------|
| (2 <i>S</i> ,4 <i>R</i> )- <i>trans</i> epoxide | 15.681         | 19374.5     |
| (2 <i>R</i> ,4 <i>S</i> )- <i>trans</i> epoxide | 16.496         | 21910.9     |
| (2 <i>R</i> ,4 <i>R</i> )- <i>cis</i> epoxide   | 18.849         | 19374.5     |
| (2 <i>S</i> ,4 <i>S</i> )- <i>cis</i> epoxide   | 20.106         | 22307.8     |

(2*R*,4*R*)-*N*-tosyl-4,5-epoxyhomoleucine ethyl ester (*cis*-**7**). (91:9 *cis:trans*) by HPLC:

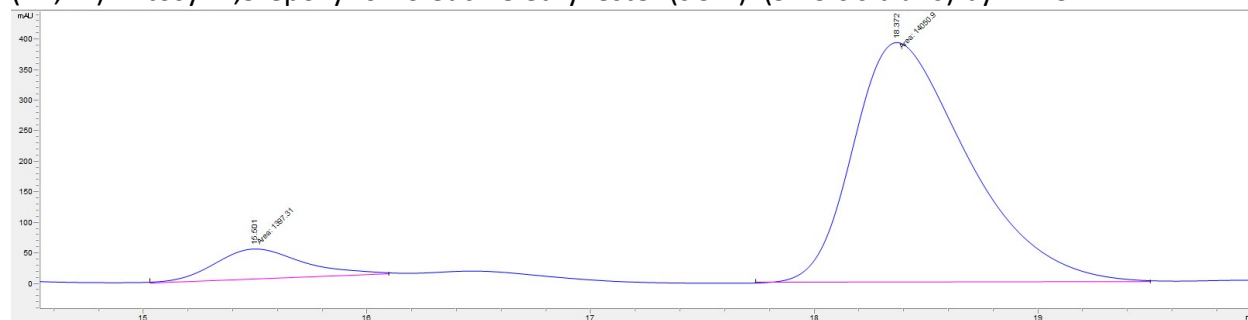

| Peak (min)                                    | retention time | integration |
|-----------------------------------------------|----------------|-------------|
| (2 <i>S</i> ,4 <i>R</i> )- <i>cis</i> epoxide | 15.501         | 1397.31     |
| (2 <i>S</i> ,4 <i>S</i> )- <i>cis</i> epoxide | 18.372         | 14050.9     |

(2*R*,4*S*)-*N*-tosyl-4,5-epoxyhomoleucine ethyl ester (*trans*-**7**). (15:85 *cis:trans*) by HPLC:

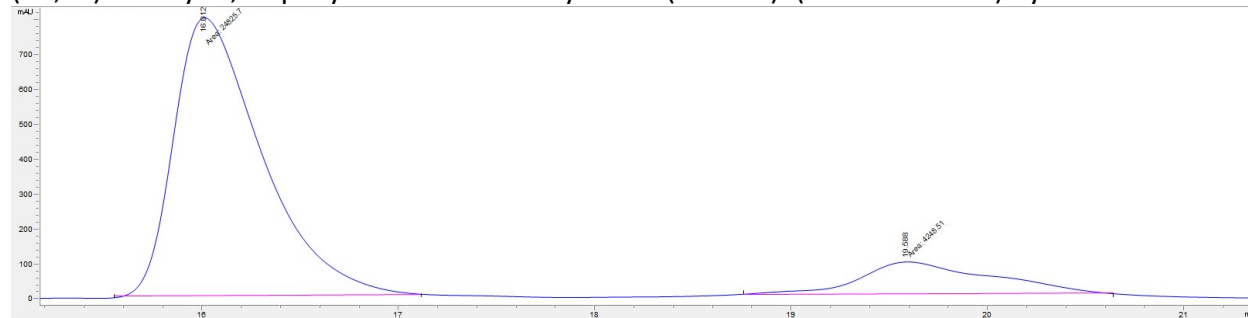

| Peak (min)                                      | retention time | integration |
|-------------------------------------------------|----------------|-------------|
| (2 <i>S</i> ,4 <i>R</i> )- <i>trans</i> epoxide | 16.612         | 24825.7     |
| (2 <i>S</i> ,4 <i>S</i> )- <i>cis</i> epoxide   | 19.558         | 4248.51     |

(2*R*,4*R*)-*N*-tosyl-4,5-epoxyhomoleucine ethyl ester (*cis*-7). (89:11 *cis*:*trans*)

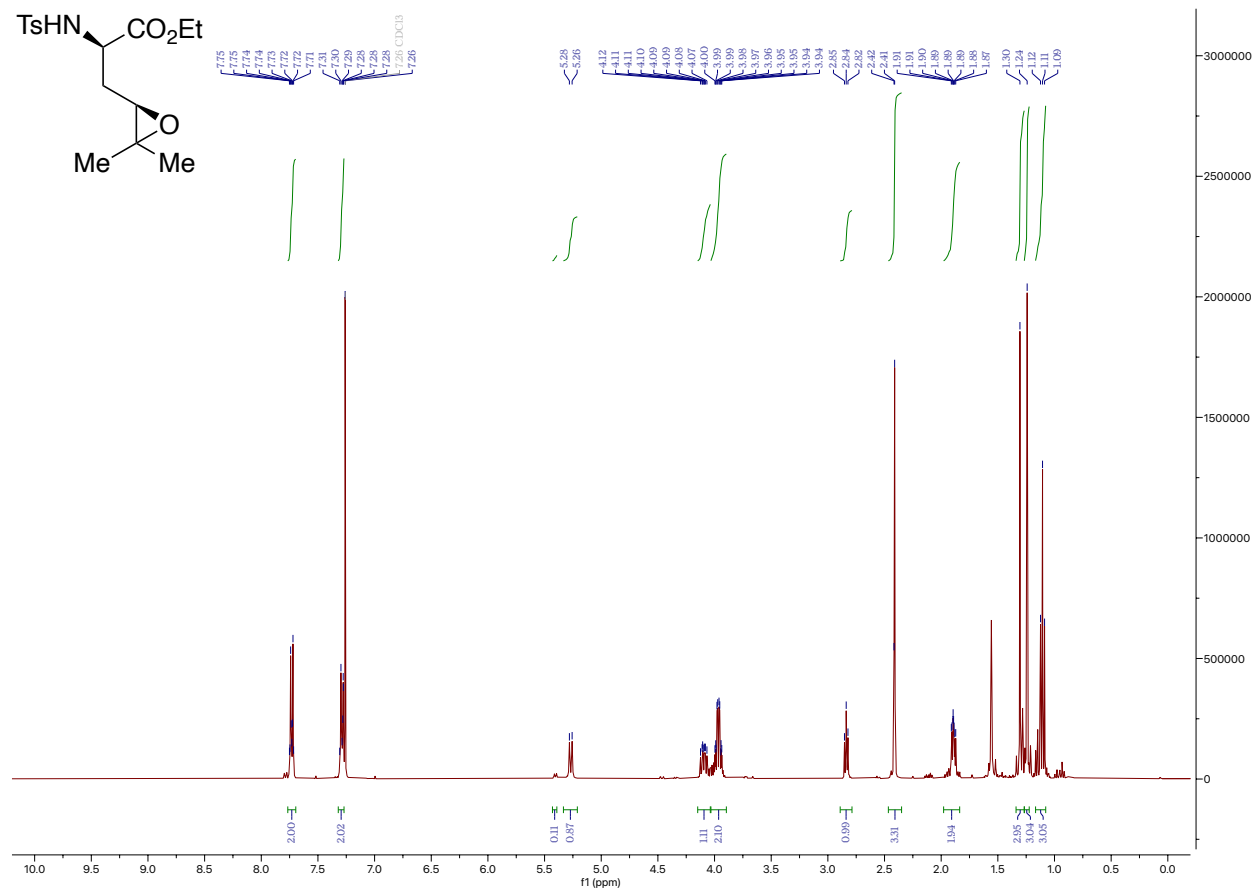

(2*S*,4*R*)-*N*-tosyl-4,5-epoxyhomoleucine ethyl ester (**trans-7**). (15:85 *cis:trans*)

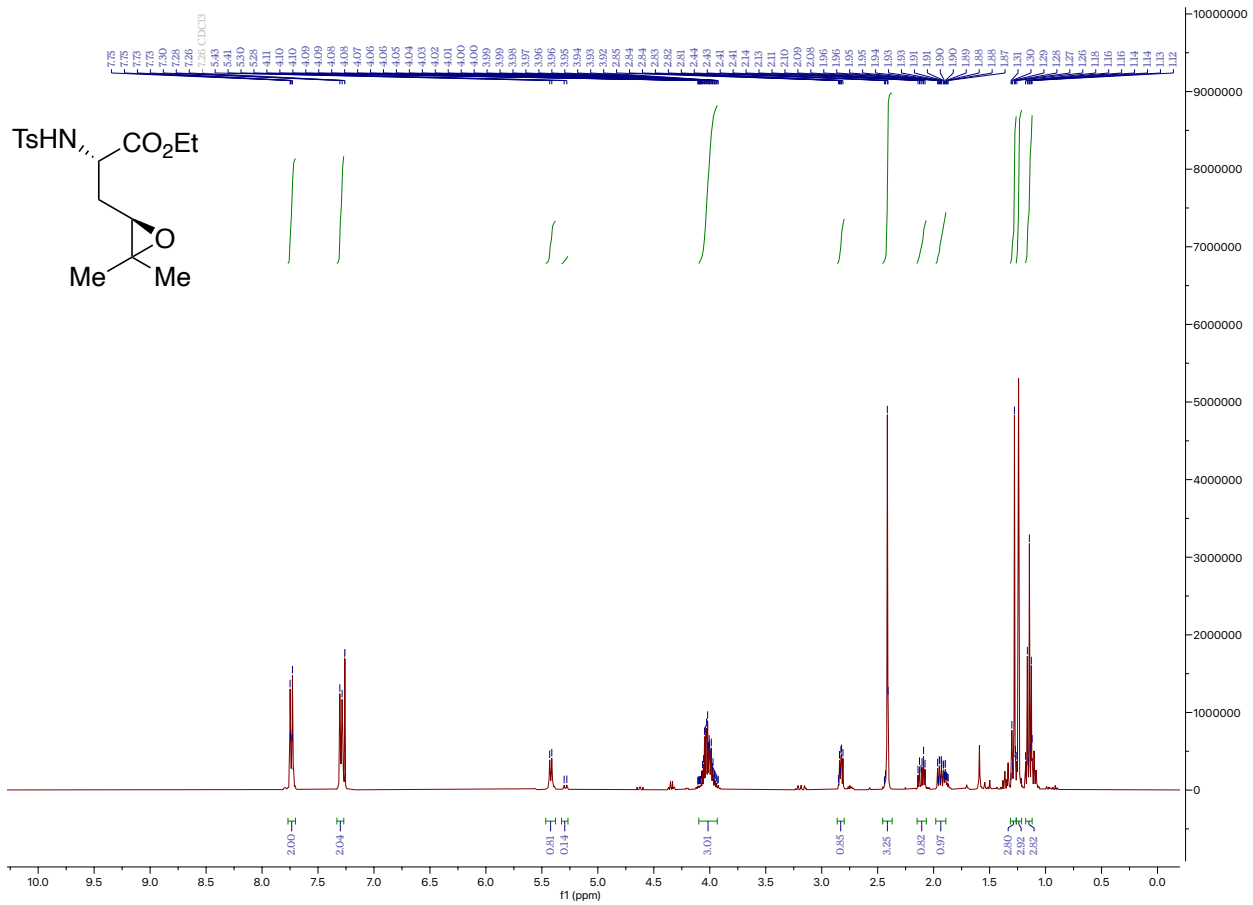

(±)-N-tosyl-2-amino-4,5-epoxy-4-cyclohexylidenebutanoic acid ethyl ester (**7b**).

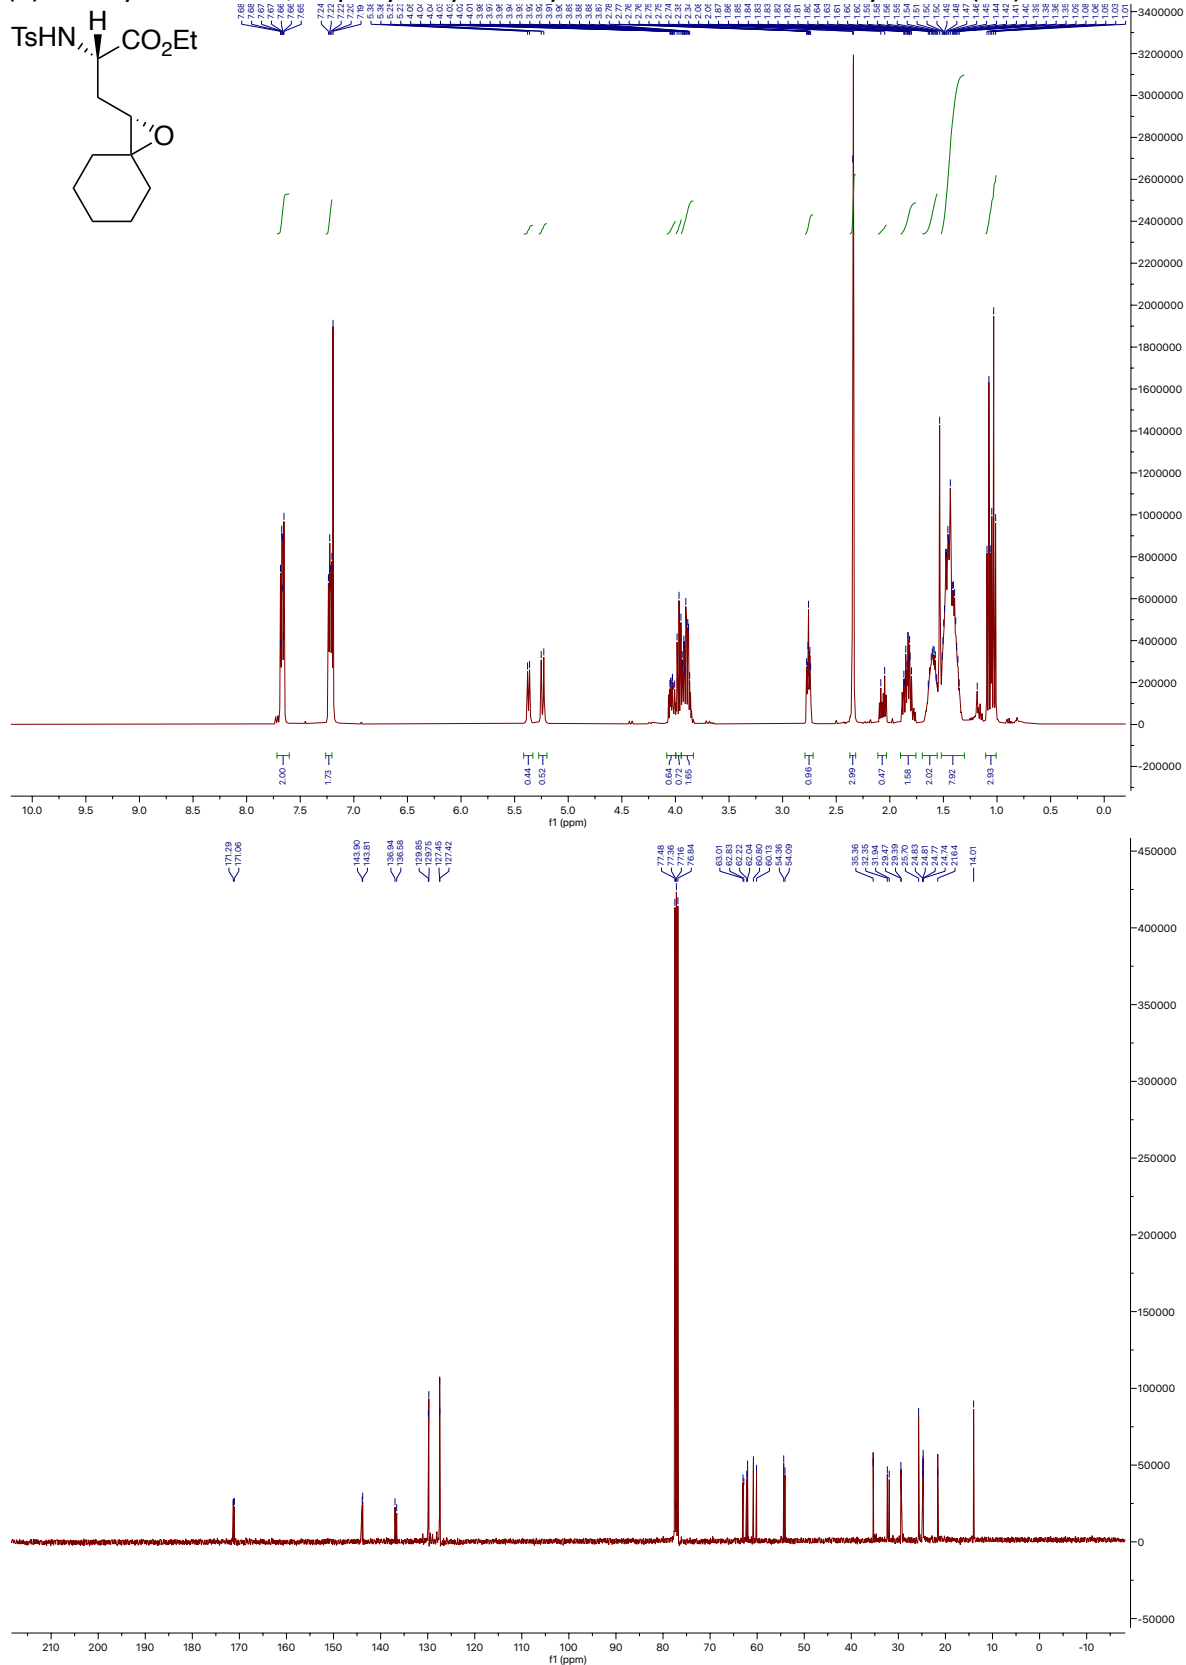



(2*R*,4*R*)-*N*-tosyl-2-amino-4,5-epoxy-4-cyclohexylidenebutanoic acid ethyl ester (**cis-7b**).  
 (91:9 *cis:trans*)

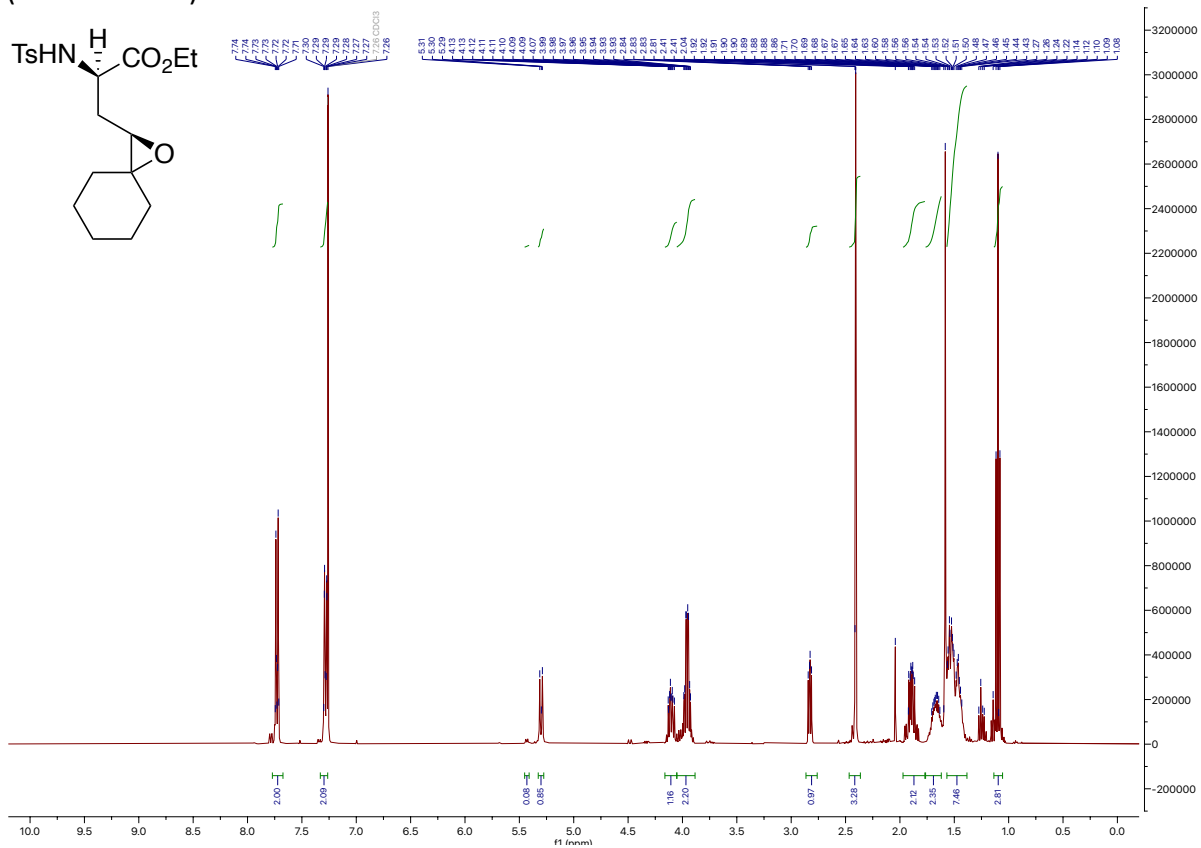

(2*R*,4*R*)-*N*-tosyl-2-amino-4,5-epoxy-5-ethylheptanoic acid ethyl ester (*cis*-**7c**). (88:12 *cis:trans*)

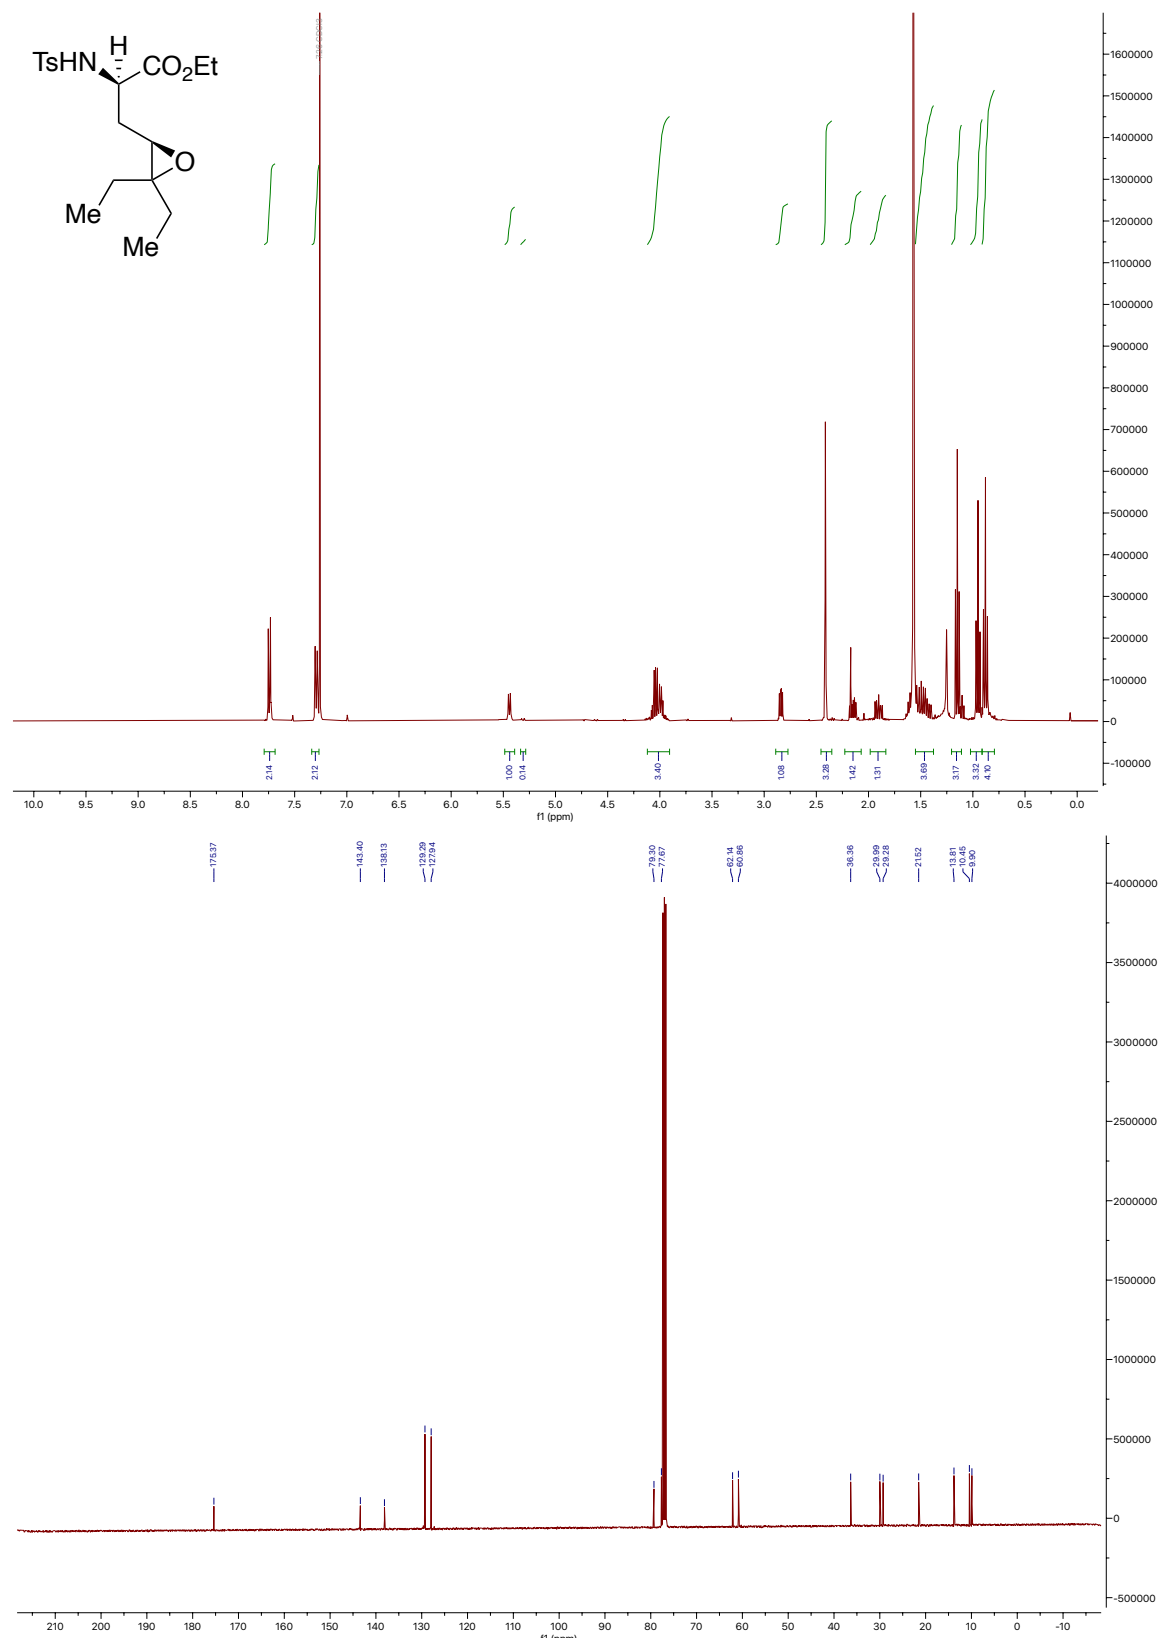

(2*R*,4*R*)-*N*-tosyl-4,5-epoxyhomoleucine methyl ester (*cis*-**7d**). (89:11 *cis:trans*)

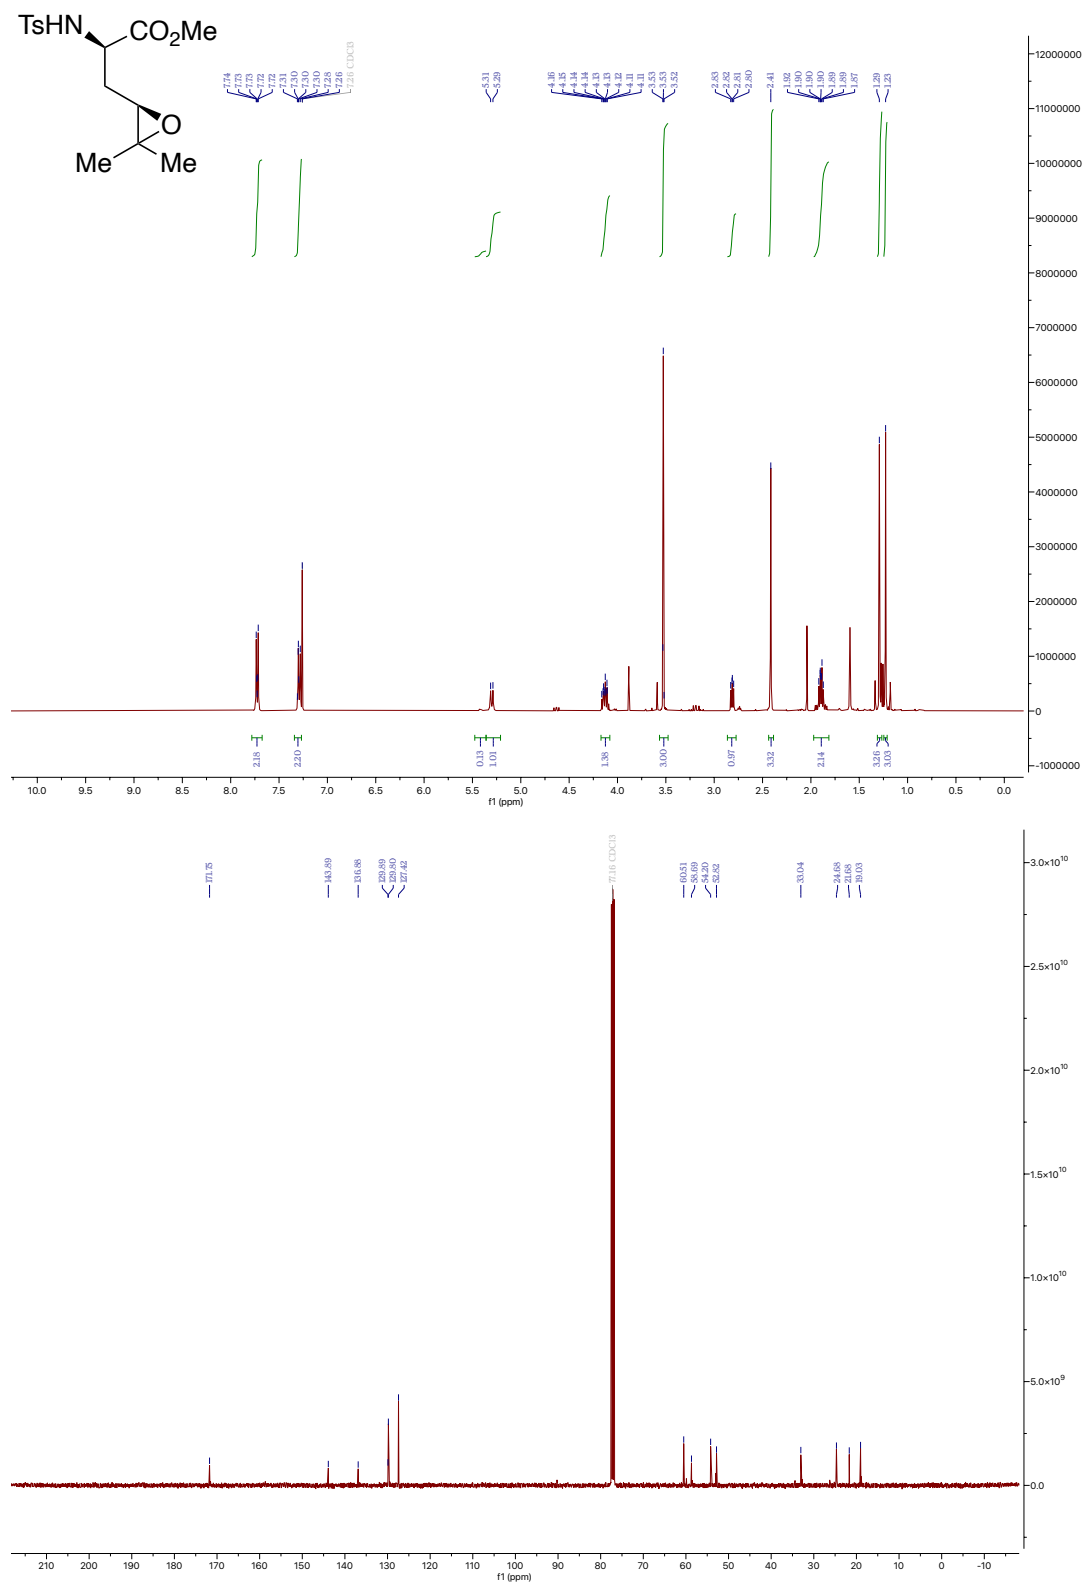

(2R,4R)-N-tosyl-4,5-epoxyhomoleucine isopropyl ester (*cis*-7e). (89:11 *cis:trans*)

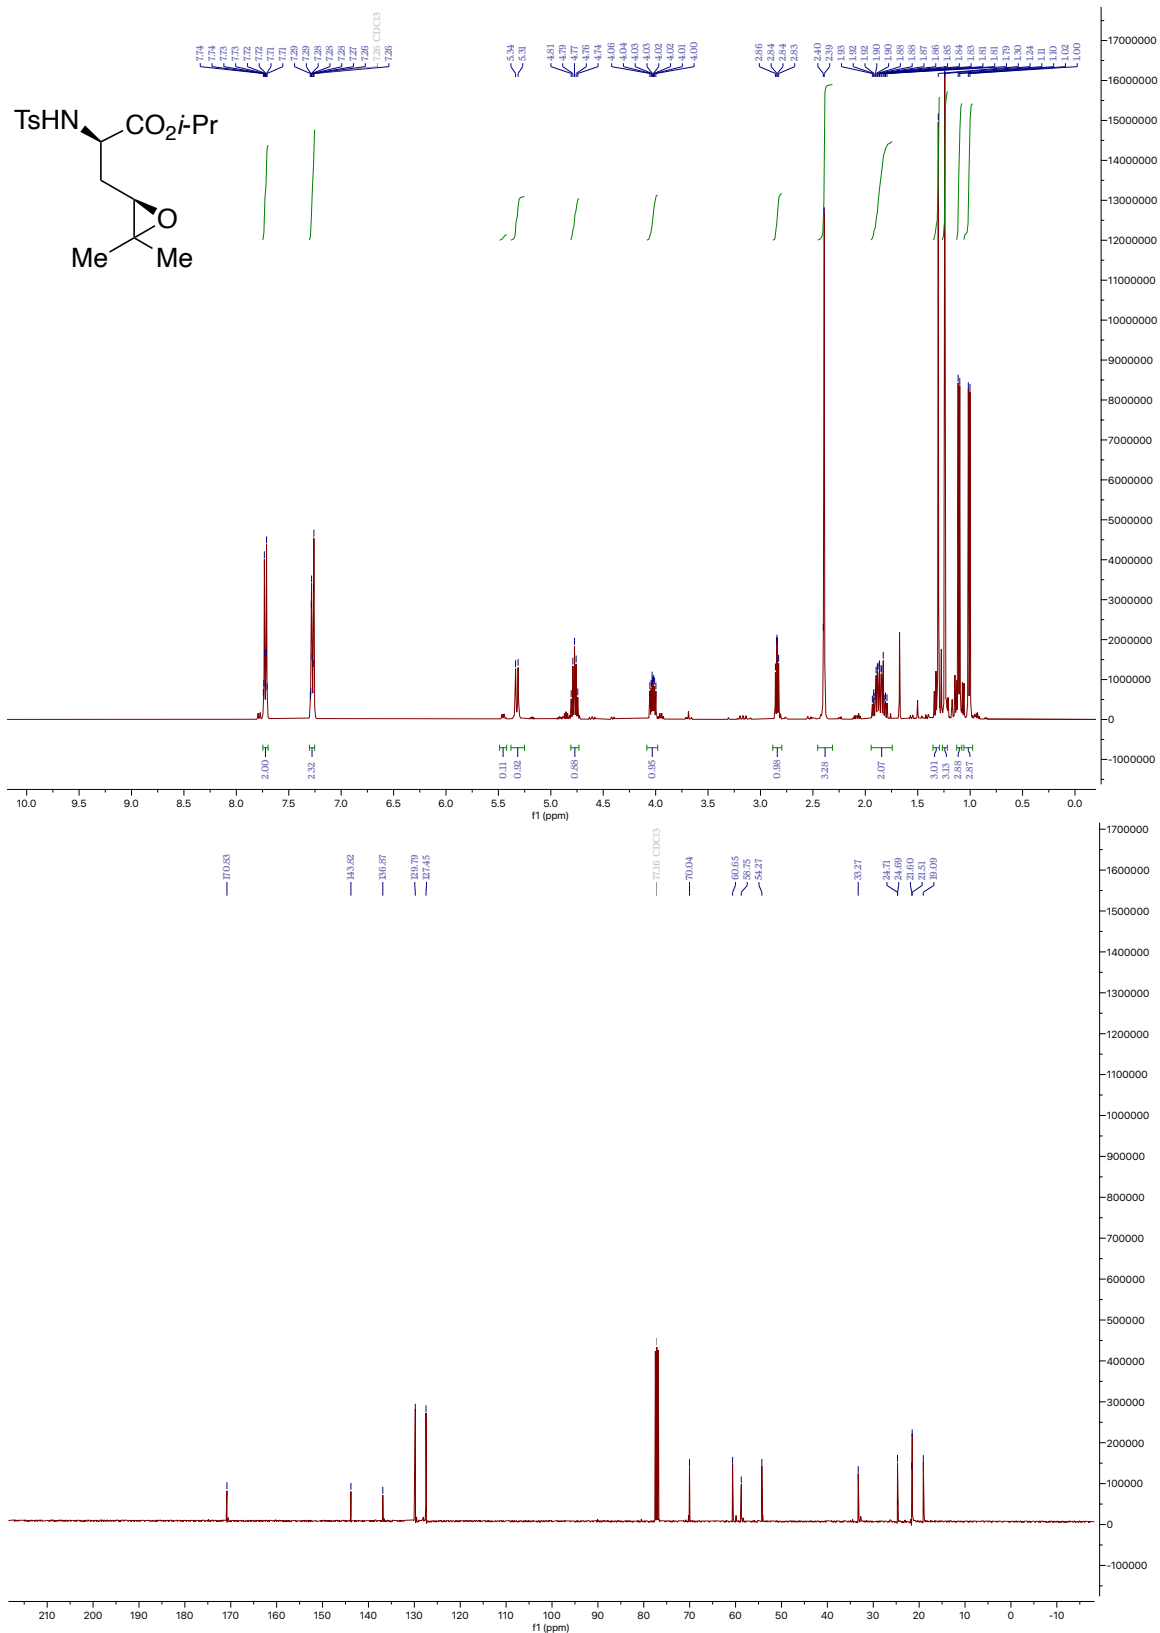

(2R,4R)-N-tosyl-4-hydroxy-5,5-dimethylproline (5).

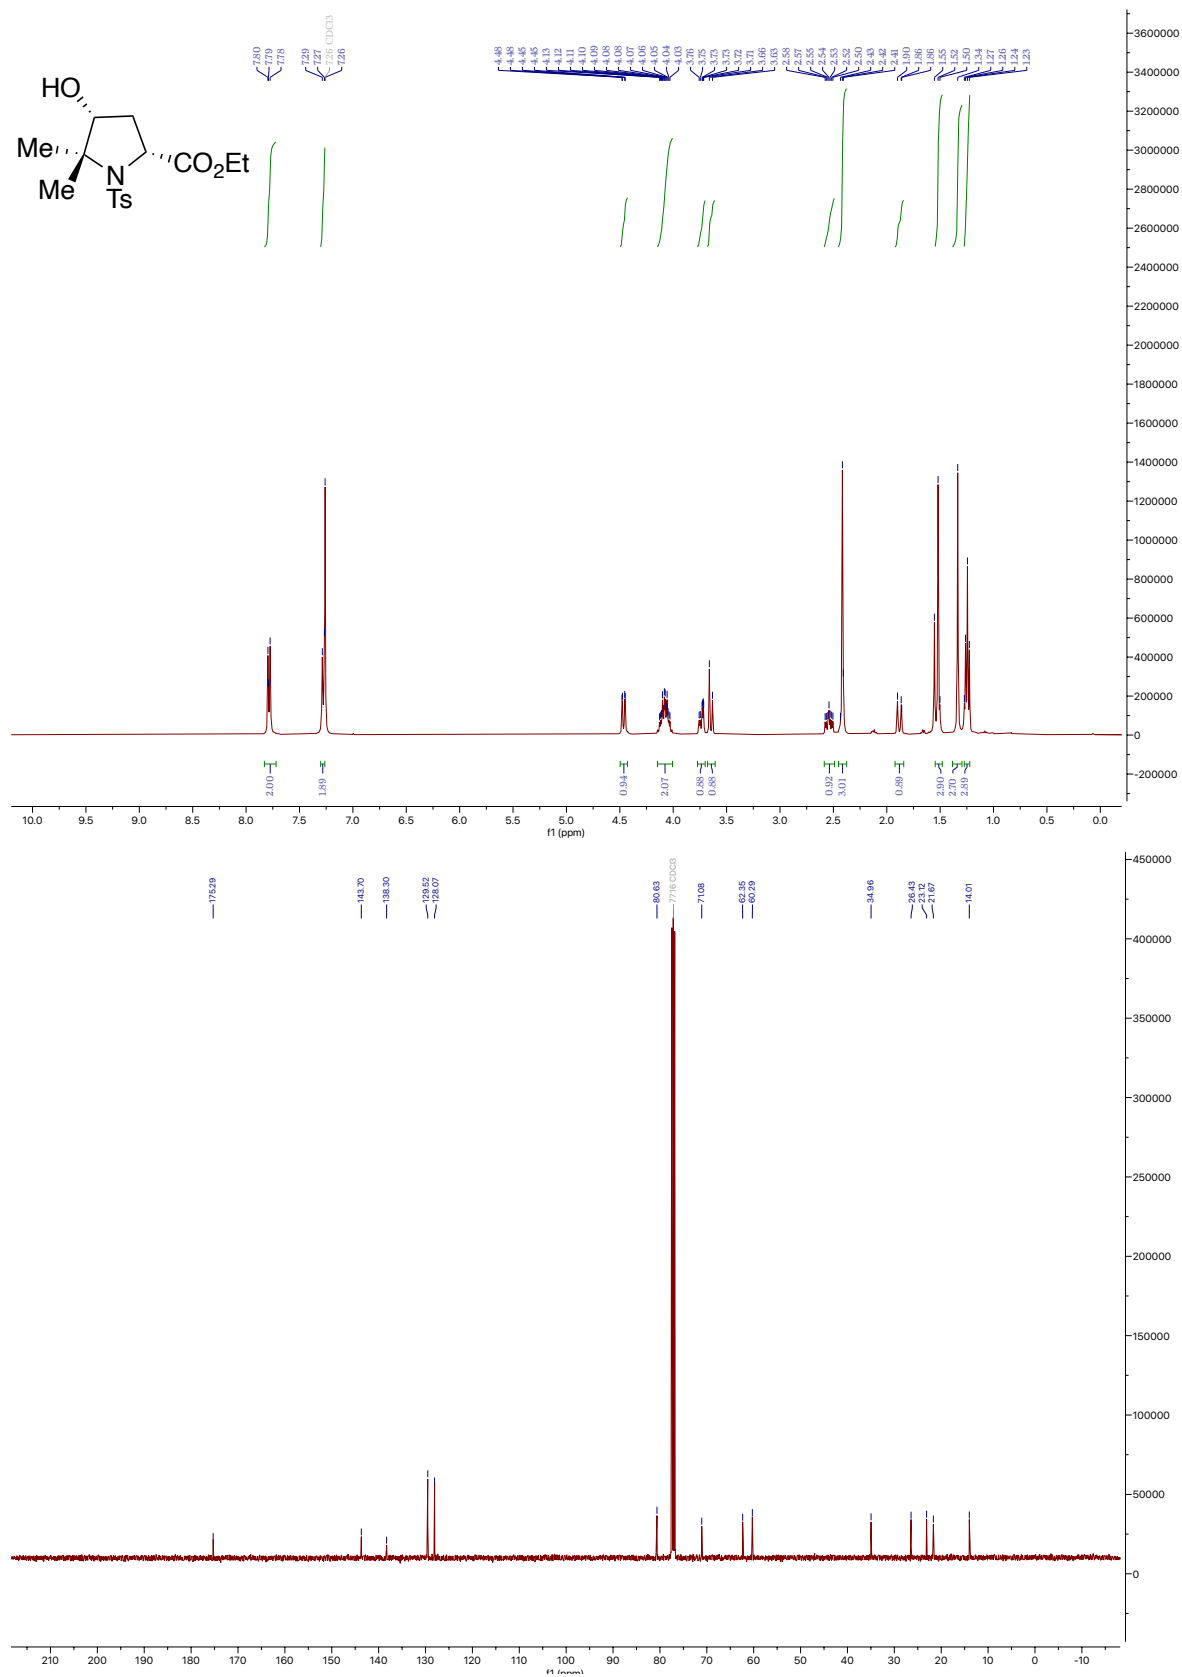

Ethyl (2*R*,4*R*)-*N*-tosyl-4-hydroxy-1-azaspiro[4.5]decane-2-carboxylate (**10**).

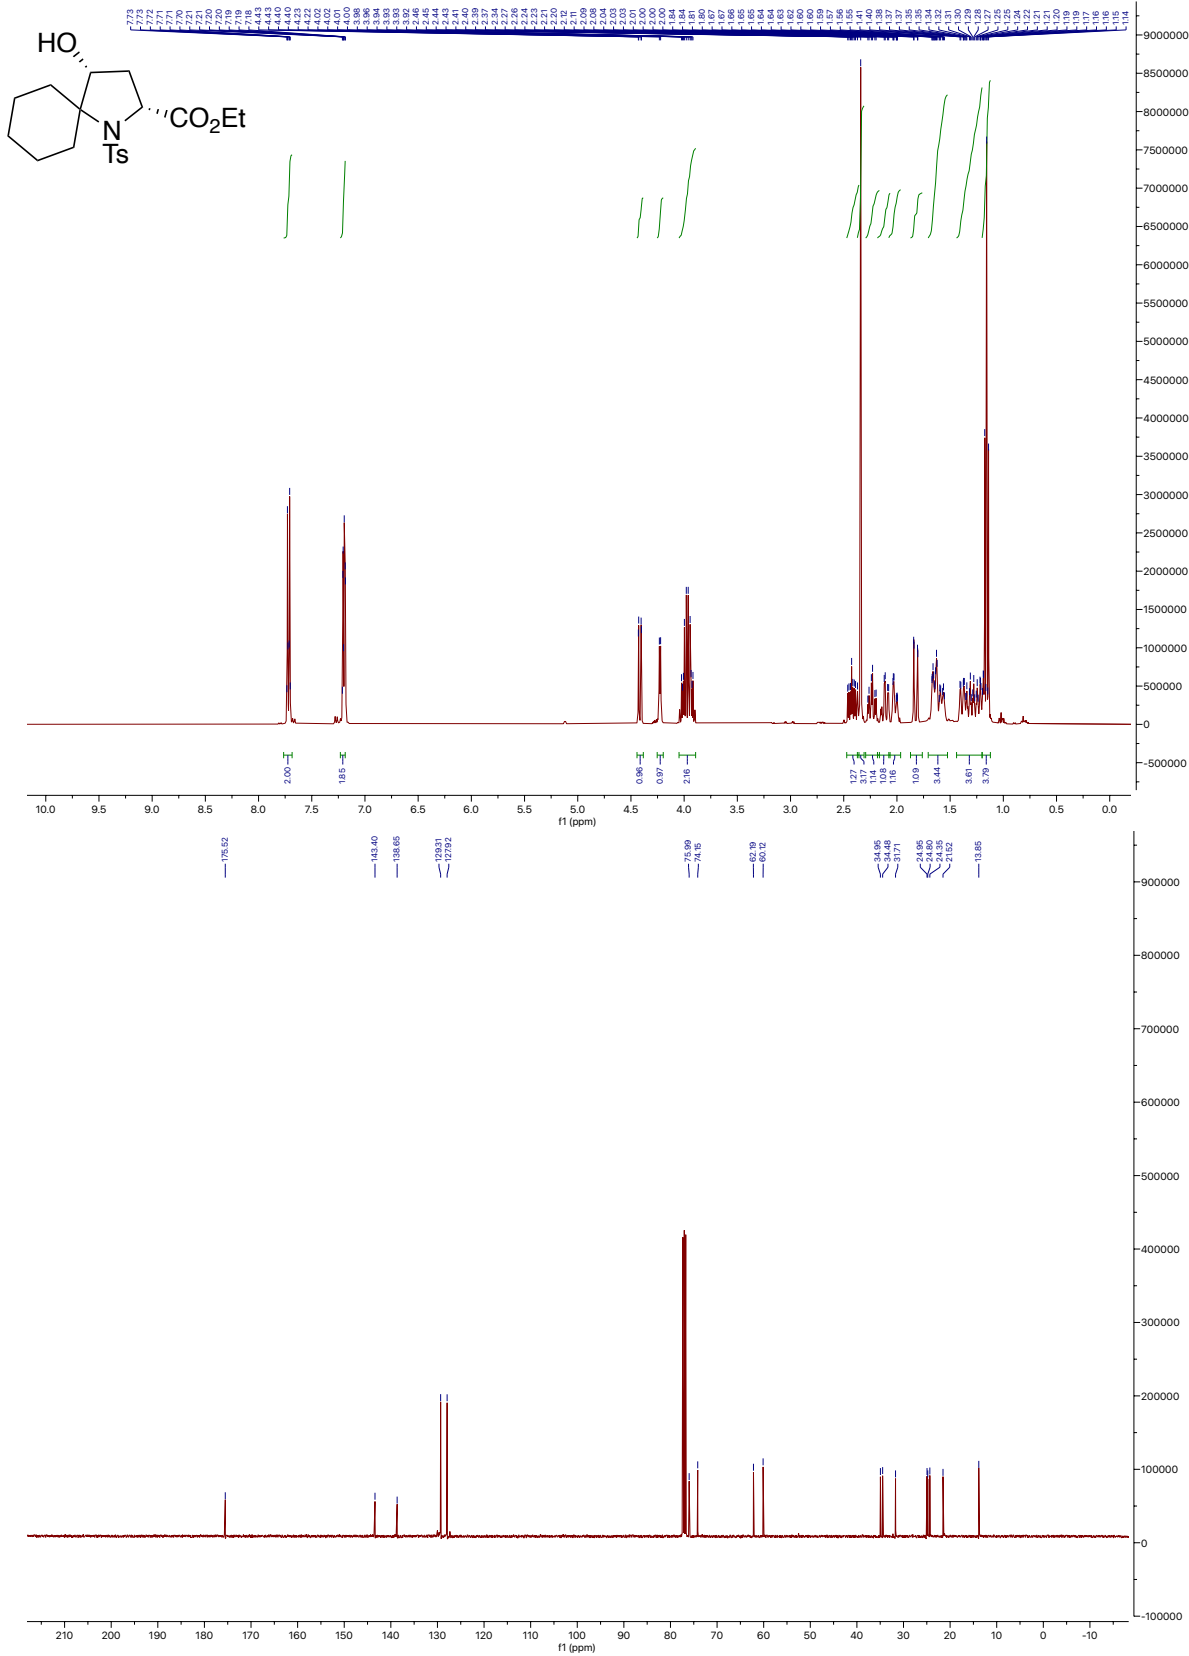

(2*R*,4*R*)-*N*-tosyl-4-hydroxy-5,5-diethylproline ethyl ester (**11**).

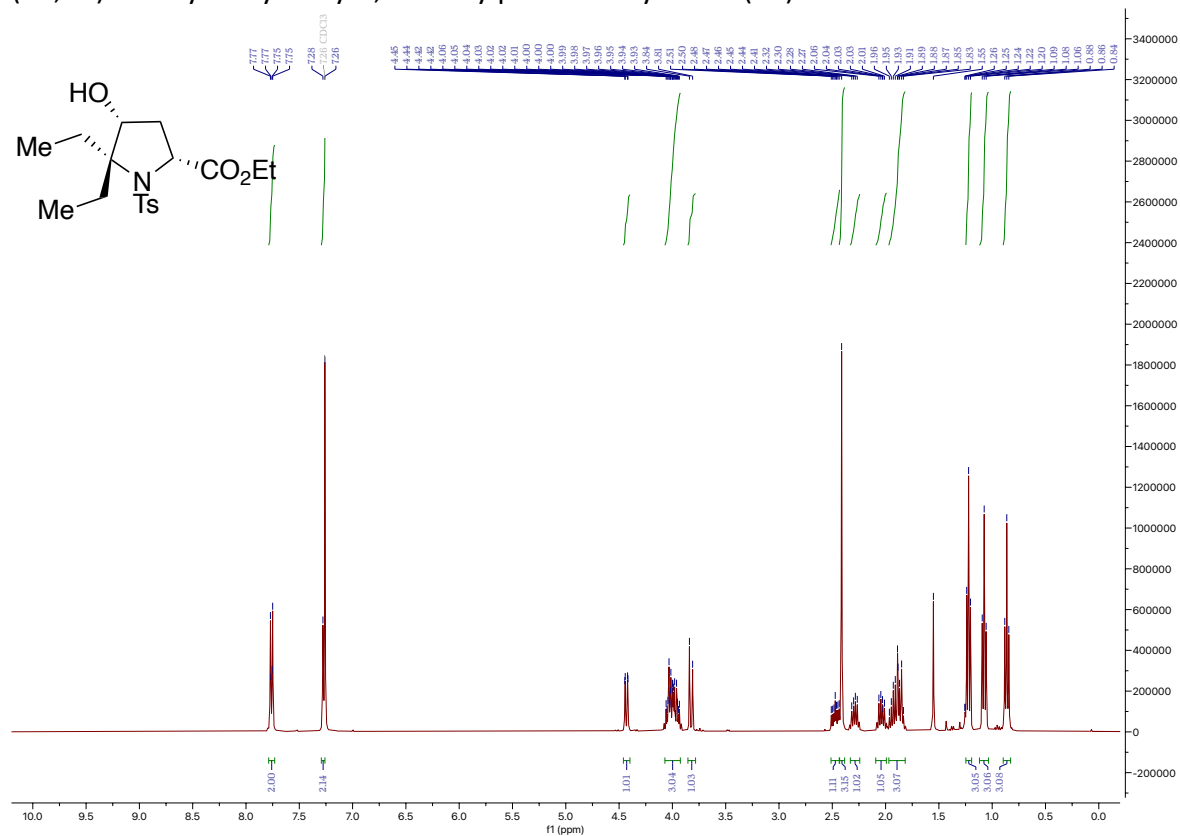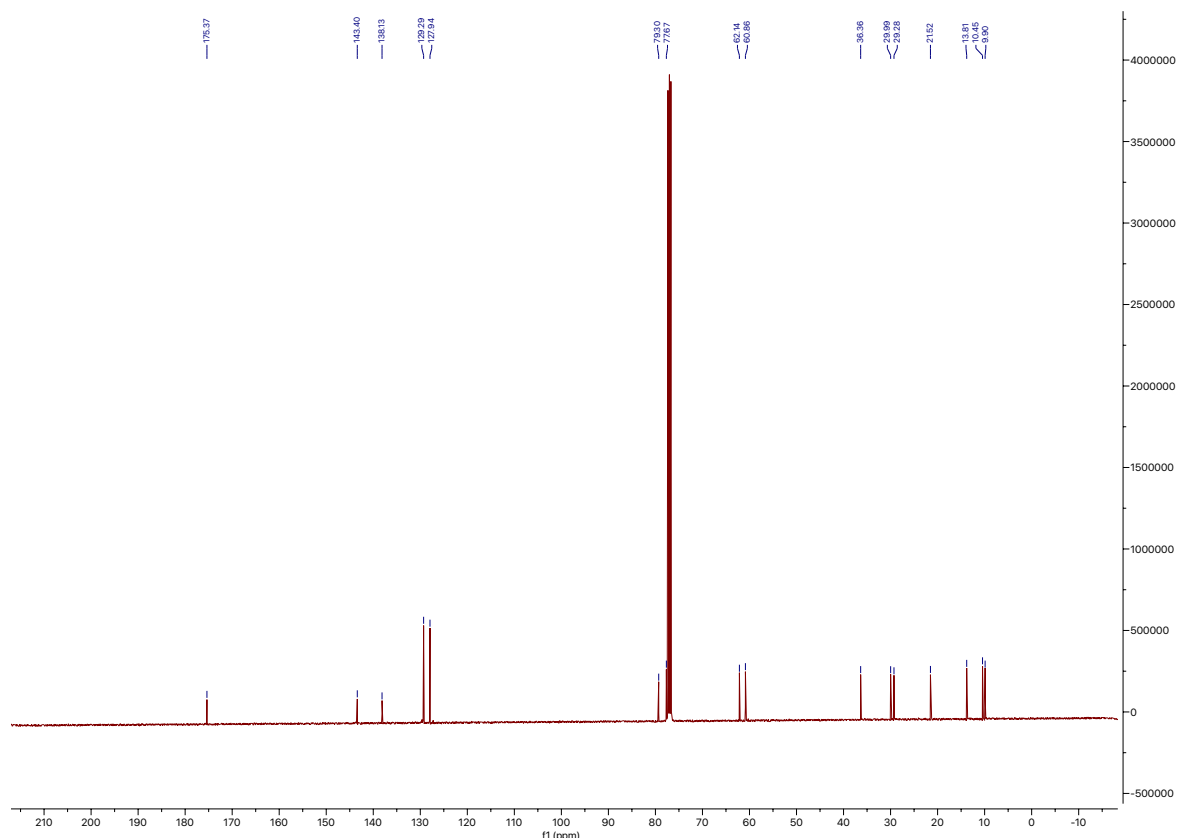

(2*R*,4*R*)-*N*-tosyl-4-hydroxy-5,5-dimethylproline methyl ester (**12**).

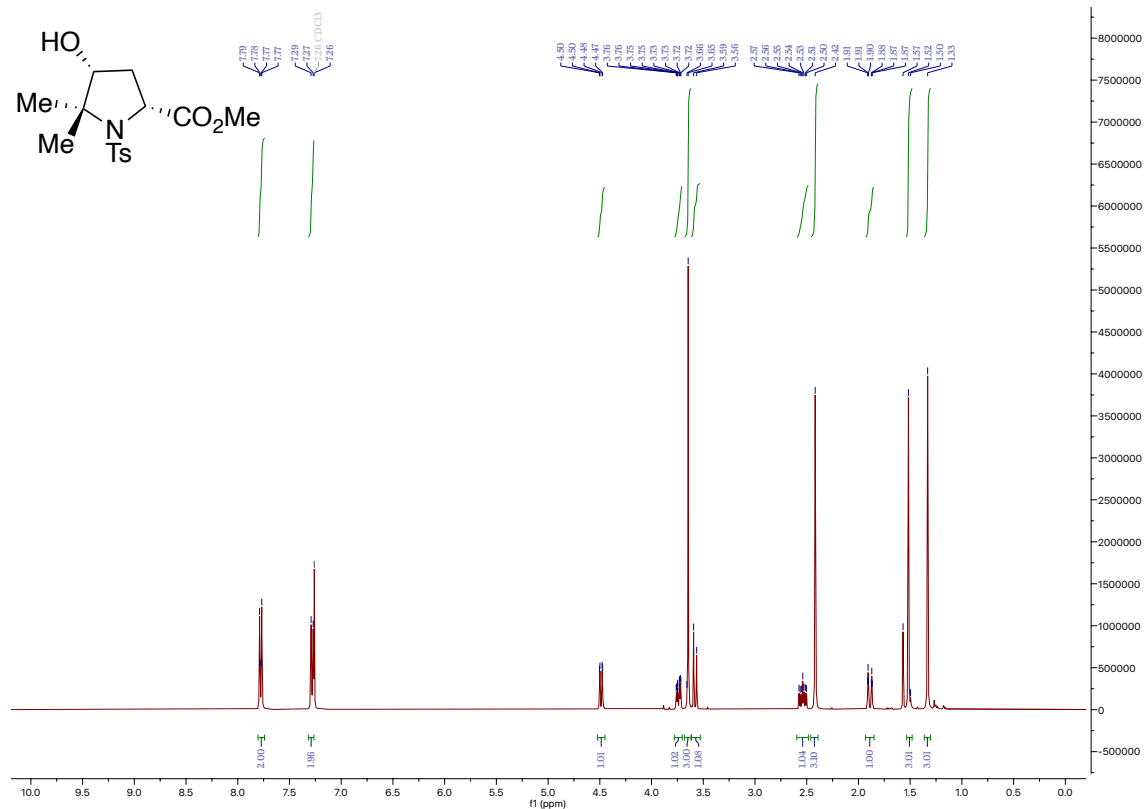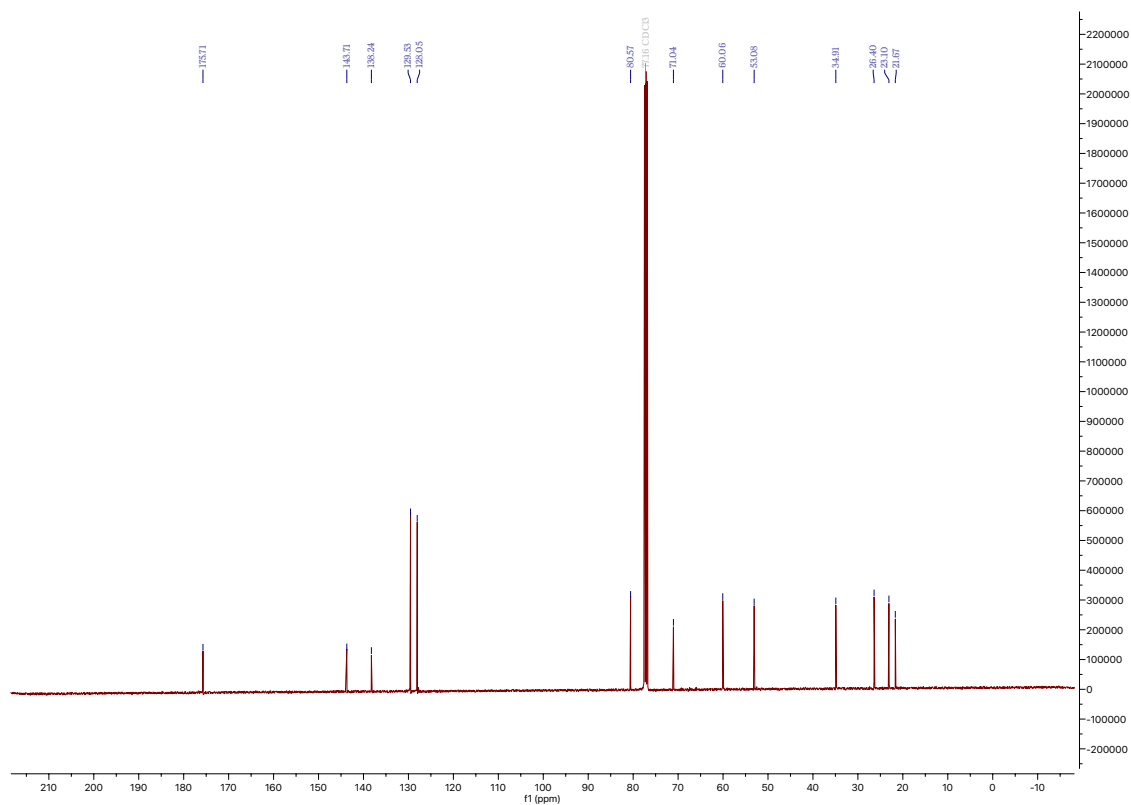



(2*R*,4*R*)-*N*-tosyl-4-hydroxy-5,5-dimethylproline isopropyl ester (**13**).

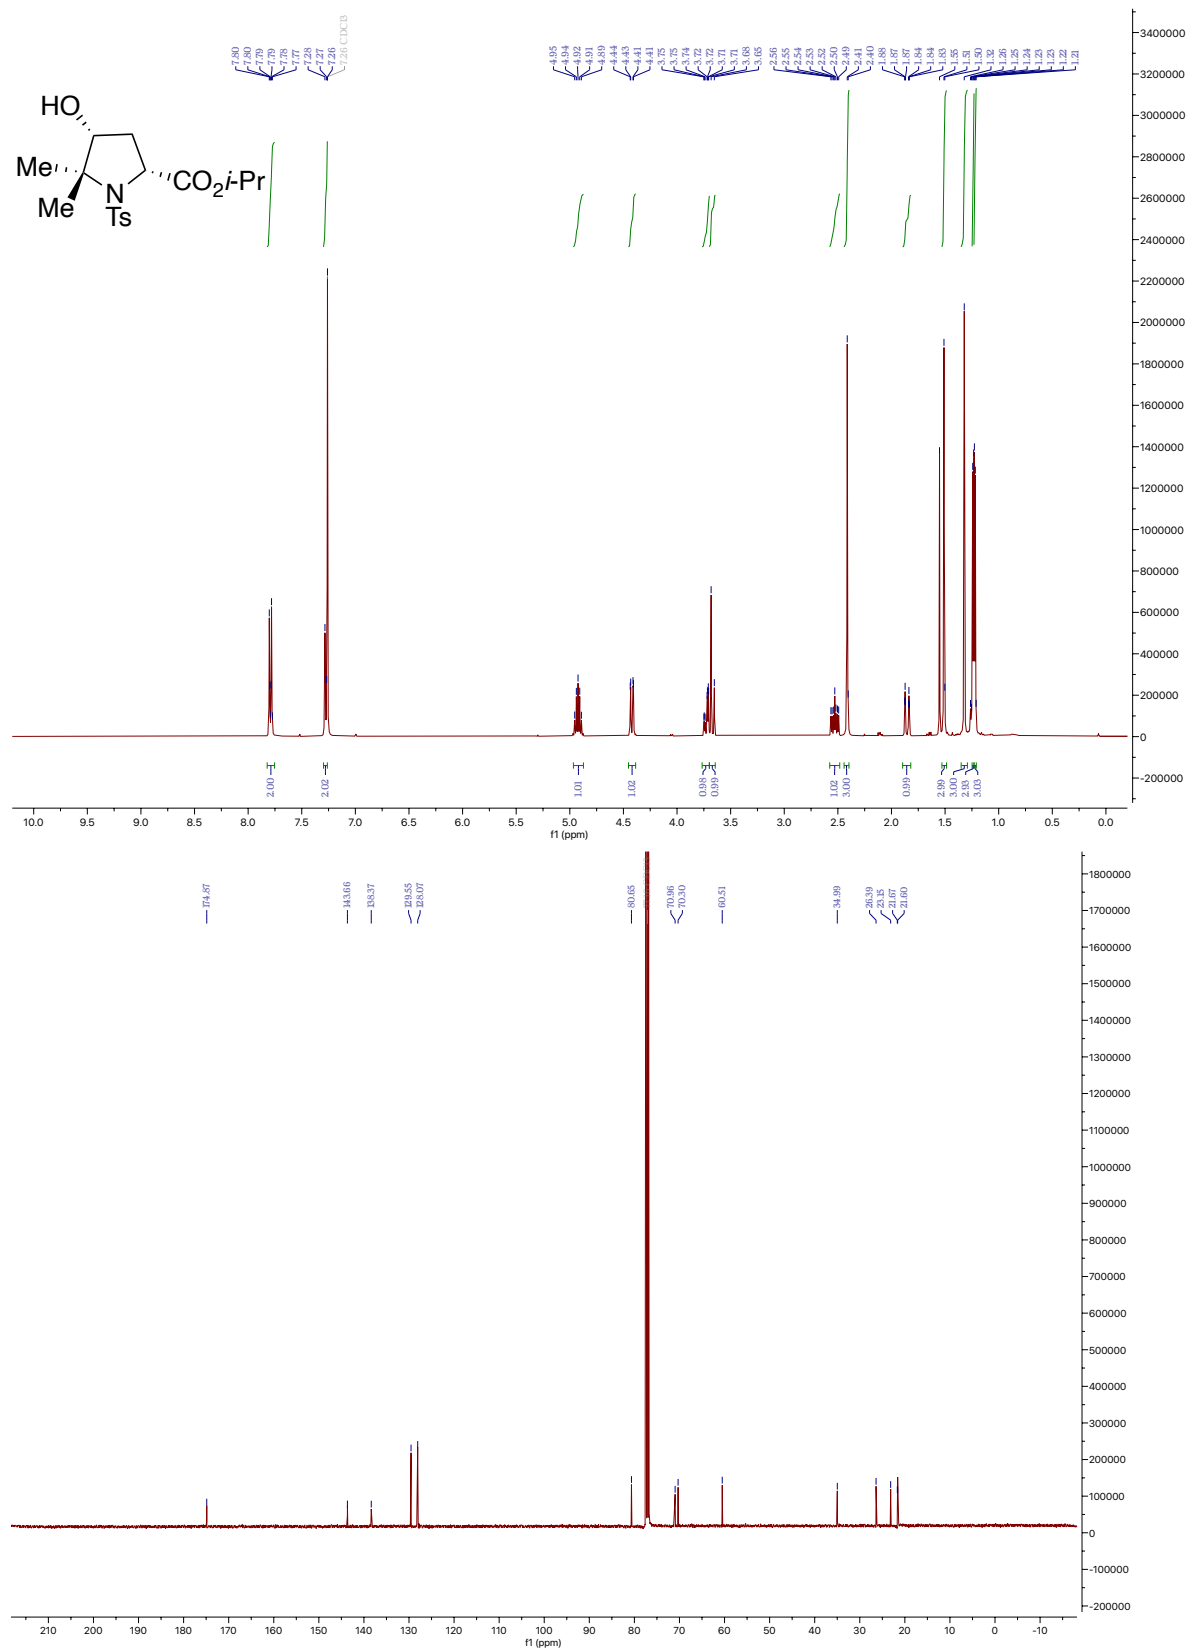

(2S)-N-tosyl-4-oxo-homoleucine (9).

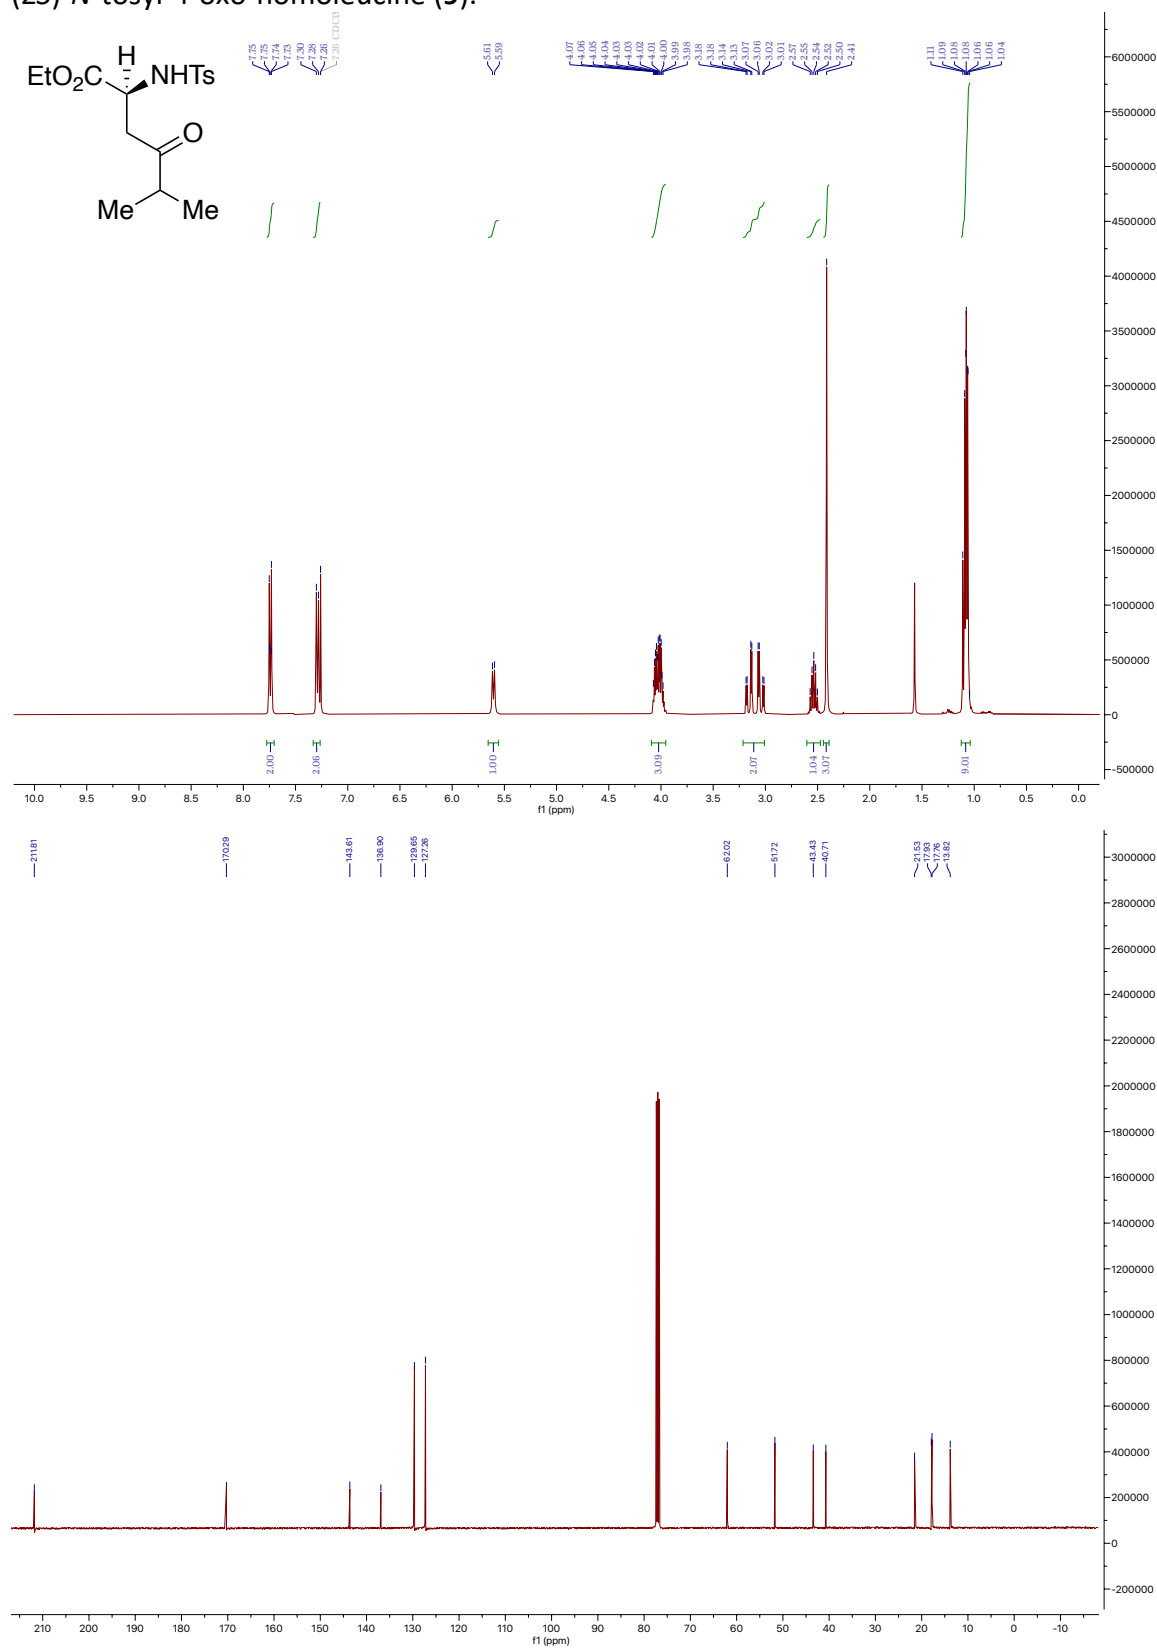

(2*S*,4*R*)-*N*-tosyl-2-amino-5-hydroxy-5-methyl-4-hexanolide (**8**).

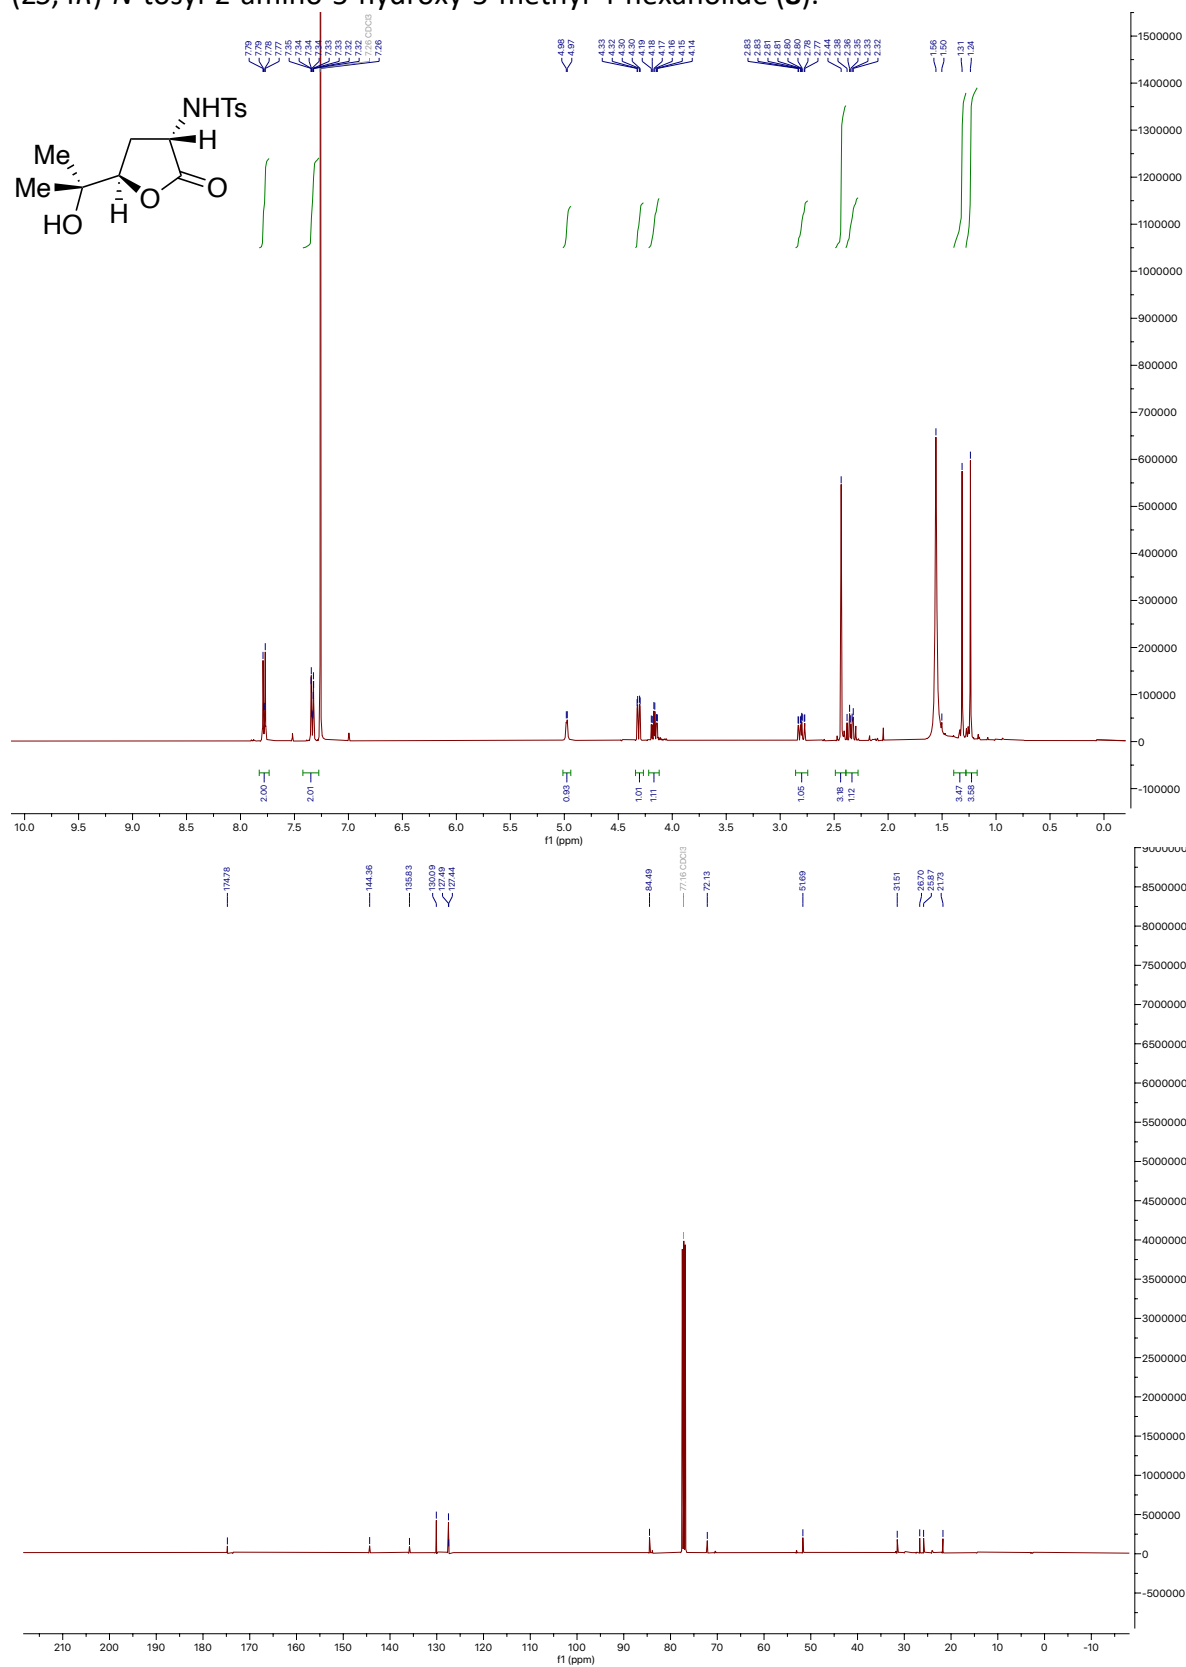

## VI. X-ray crystallographic data

Crystallographic information for (2*R*)-*N*-tosyl-4-hydroxy-5,5-dimethylproline (**5**).

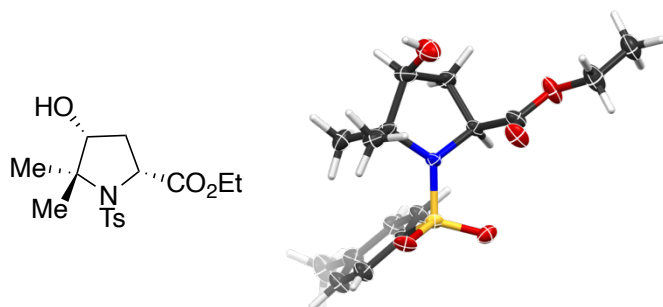

|                                                              |                                                                              |
|--------------------------------------------------------------|------------------------------------------------------------------------------|
| Empirical formula                                            | C <sub>16</sub> H <sub>23</sub> NO <sub>5</sub> S                            |
| Formula weight                                               | 341.41                                                                       |
| Temperature/K                                                | 100.15                                                                       |
| Crystal system                                               | monoclinic                                                                   |
| Space group                                                  | <i>P</i> 2 <sub>1</sub> / <i>c</i>                                           |
| <i>a</i> /Å                                                  | 7.4892(3)                                                                    |
| <i>b</i> /Å                                                  | 12.0747(5)                                                                   |
| <i>c</i> /Å                                                  | 18.9252(10)                                                                  |
| $\alpha$ /°                                                  | 90                                                                           |
| $\beta$ /°                                                   | 98.818(5)                                                                    |
| $\gamma$ /°                                                  | 90                                                                           |
| Volume/Å <sup>3</sup>                                        | 1691.17(13)                                                                  |
| <i>Z</i>                                                     | 4                                                                            |
| $\rho_{\text{calc}}$ /cm <sup>3</sup>                        | 1.341                                                                        |
| $\mu$ /mm <sup>-1</sup>                                      | 0.216                                                                        |
| <i>F</i> (000)                                               | 728.0                                                                        |
| Crystal size/mm <sup>3</sup>                                 | 0.595 × 0.128 × 0.055                                                        |
| Radiation                                                    | MoK $\alpha$ ( $\lambda$ = 0.71073)                                          |
| 2 $\theta$ range for data collection/°                       | 4.356 to 49.992                                                              |
| Index ranges                                                 | -8 ≤ <i>h</i> ≤ 8, -14 ≤ <i>k</i> ≤ 14, -22 ≤ <i>l</i> ≤ 22                  |
| Reflections collected                                        | 9970                                                                         |
| Independent reflections                                      | 2963 [ <i>R</i> <sub>int</sub> = 0.0559, <i>R</i> <sub>sigma</sub> = 0.0635] |
| Data/restraints/parameters                                   | 2963/0/213                                                                   |
| Goodness-of-fit on <i>F</i> <sup>2</sup>                     | 1.102                                                                        |
| Final <i>R</i> indexes [ <i>I</i> ≥ 2 $\sigma$ ( <i>I</i> )] | <i>R</i> <sub>1</sub> = 0.0597, <i>wR</i> <sub>2</sub> = 0.1715              |
| Final <i>R</i> indexes [all data]                            | <i>R</i> <sub>1</sub> = 0.0779, <i>wR</i> <sub>2</sub> = 0.1807              |
| Largest diff. peak/hole / e Å <sup>-3</sup>                  | 1.43/-0.39                                                                   |
| CCDC number                                                  | 2385171                                                                      |

Crystallographic information for (2*R*,4*S*)-*N*-tosyl-2-amino-5-hydroxy-5-methyl-4-hexanolide (*P*2<sub>1</sub>/*c* polymorph, **8a**).

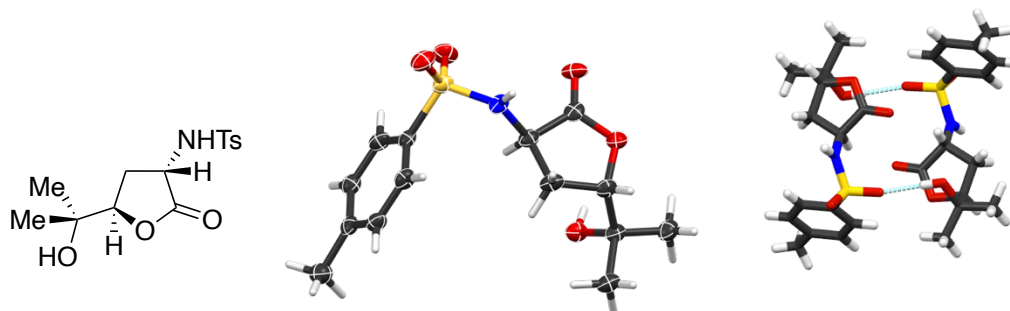

|                                                              |                                                                              |
|--------------------------------------------------------------|------------------------------------------------------------------------------|
| Empirical formula                                            | C <sub>14</sub> H <sub>19</sub> NO <sub>5</sub> S                            |
| Formula weight                                               | 313.36                                                                       |
| Temperature/K                                                | 99.97(17)                                                                    |
| Crystal system                                               | monoclinic                                                                   |
| Space group                                                  | <i>P</i> 2 <sub>1</sub> / <i>c</i>                                           |
| <i>a</i> /Å                                                  | 11.5944(8)                                                                   |
| <i>b</i> /Å                                                  | 11.4209(7)                                                                   |
| <i>c</i> /Å                                                  | 11.4442(6)                                                                   |
| $\alpha$ /°                                                  | 90                                                                           |
| $\beta$ /°                                                   | 102.045(5)                                                                   |
| $\gamma$ /°                                                  | 90                                                                           |
| Volume/Å <sup>3</sup>                                        | 1482.06(16)                                                                  |
| <i>Z</i>                                                     | 4                                                                            |
| $\rho_{\text{calc}}/\text{cm}^3$                             | 1.404                                                                        |
| $\mu/\text{mm}^{-1}$                                         | 0.239                                                                        |
| <i>F</i> (000)                                               | 664.0                                                                        |
| Crystal size/mm <sup>3</sup>                                 | 0.28 × 0.14 × 0.07                                                           |
| Radiation                                                    | Mo K $\alpha$ ( $\lambda$ = 0.71073)                                         |
| 2 $\theta$ range for data collection/°                       | 5.062 to 50                                                                  |
| Index ranges                                                 | -13 ≤ <i>h</i> ≤ 13, -12 ≤ <i>k</i> ≤ 13, -13 ≤ <i>l</i> ≤ 13                |
| Reflections collected                                        | 12516                                                                        |
| Independent reflections                                      | 2607 [ <i>R</i> <sub>int</sub> = 0.0786, <i>R</i> <sub>sigma</sub> = 0.0819] |
| Data/restraints/parameters                                   | 2607/0/194                                                                   |
| Goodness-of-fit on <i>F</i> <sup>2</sup>                     | 0.985                                                                        |
| Final <i>R</i> indexes [ <i>I</i> ≥ 2 $\sigma$ ( <i>I</i> )] | <i>R</i> <sub>1</sub> = 0.0481, <i>wR</i> <sub>2</sub> = 0.1018              |
| Final <i>R</i> indexes [all data]                            | <i>R</i> <sub>1</sub> = 0.0919, <i>wR</i> <sub>2</sub> = 0.1114              |
| Largest diff. peak/hole / e Å <sup>-3</sup>                  | 0.22/-0.40                                                                   |
| CCDC number                                                  | 2385172                                                                      |

(2*R*,4*S*)-*N*-tosyl-2-amino-5-hydroxy-5-methyl-4-hexanolide (*Pna*2<sub>1</sub> polymorph, **8b**).

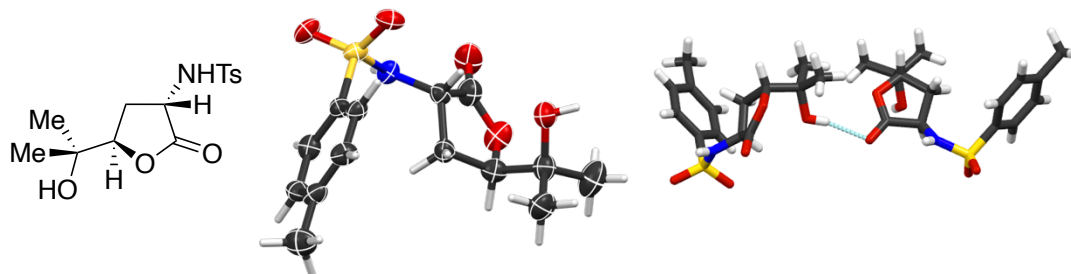

|                                                              |                                                                              |
|--------------------------------------------------------------|------------------------------------------------------------------------------|
| Empirical formula                                            | C <sub>14</sub> H <sub>19</sub> NO <sub>5</sub> S                            |
| Formula weight                                               | 313.36                                                                       |
| Temperature/K                                                | 99.97(16)                                                                    |
| Crystal system                                               | orthorhombic                                                                 |
| Space group                                                  | <i>Pna</i> 2 <sub>1</sub>                                                    |
| <i>a</i> /Å                                                  | 11.4970(17)                                                                  |
| <i>b</i> /Å                                                  | 20.881(3)                                                                    |
| <i>c</i> /Å                                                  | 6.4271(12)                                                                   |
| $\alpha$ /°                                                  | 90                                                                           |
| $\beta$ /°                                                   | 90                                                                           |
| $\gamma$ /°                                                  | 90                                                                           |
| Volume/Å <sup>3</sup>                                        | 1543.0(4)                                                                    |
| <i>Z</i>                                                     | 4                                                                            |
| $\rho_{\text{calc}}$ /cm <sup>3</sup>                        | 1.349                                                                        |
| $\mu$ /mm <sup>-1</sup>                                      | 0.230                                                                        |
| <i>F</i> (000)                                               | 664.0                                                                        |
| Crystal size/mm <sup>3</sup>                                 | 0.988 × 0.053 × 0.033                                                        |
| Radiation                                                    | Mo K $\alpha$ ( $\lambda$ = 0.71073)                                         |
| 2 $\theta$ range for data collection/°                       | 5.27 to 49.98                                                                |
| Index ranges                                                 | -13 ≤ <i>h</i> ≤ 13, -24 ≤ <i>k</i> ≤ 24, -7 ≤ <i>l</i> ≤ 7                  |
| Reflections collected                                        | 10443                                                                        |
| Independent reflections                                      | 2707 [ <i>R</i> <sub>int</sub> = 0.0928, <i>R</i> <sub>sigma</sub> = 0.1095] |
| Data/restraints/parameters                                   | 2707/1/194                                                                   |
| Goodness-of-fit on <i>F</i> <sup>2</sup>                     | 0.983                                                                        |
| Final <i>R</i> indexes [ <i>I</i> ≥ 2 $\sigma$ ( <i>I</i> )] | <i>R</i> <sub>1</sub> = 0.0577, <i>wR</i> <sub>2</sub> = 0.1030              |
| Final <i>R</i> indexes [all data]                            | <i>R</i> <sub>1</sub> = 0.1056, <i>wR</i> <sub>2</sub> = 0.1127              |
| Largest diff. peak/hole / e Å <sup>-3</sup>                  | 0.25/-0.32                                                                   |
| Flack parameter                                              | 0.06(13)                                                                     |
| CCDC number                                                  | 2385173                                                                      |

Crystallographic information for (2*R*)-*N*-tosyl-4-oxo-homoleucine (**9**).

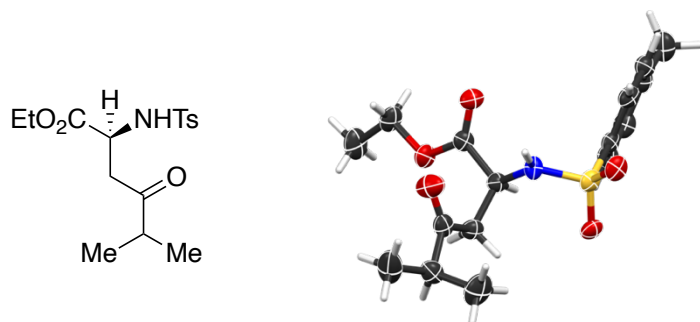

|                                                              |                                                                              |
|--------------------------------------------------------------|------------------------------------------------------------------------------|
| Empirical formula                                            | C <sub>16</sub> H <sub>23</sub> NO <sub>5</sub> S                            |
| Formula weight                                               | 341.41                                                                       |
| Temperature/K                                                | 100.15                                                                       |
| Crystal system                                               | monoclinic                                                                   |
| Space group                                                  | <i>P</i> 2 <sub>1</sub> / <i>c</i>                                           |
| <i>a</i> /Å                                                  | 20.066(2)                                                                    |
| <i>b</i> /Å                                                  | 5.1482(5)                                                                    |
| <i>c</i> /Å                                                  | 18.0857(18)                                                                  |
| $\alpha$ /°                                                  | 90                                                                           |
| $\beta$ /°                                                   | 110.174(12)                                                                  |
| $\gamma$ /°                                                  | 90                                                                           |
| Volume/Å <sup>3</sup>                                        | 1753.7(3)                                                                    |
| <i>Z</i>                                                     | 4                                                                            |
| $\rho_{\text{calc}}/\text{cm}^3$                             | 1.293                                                                        |
| $\mu/\text{mm}^{-1}$                                         | 0.208                                                                        |
| <i>F</i> (000)                                               | 728.0                                                                        |
| Crystal size/mm <sup>3</sup>                                 | 0.614 × 0.05 × 0.033                                                         |
| Radiation                                                    | MoK $\alpha$ ( $\lambda$ = 0.71073)                                          |
| 2 $\theta$ range for data collection/°                       | 4.532 to 49.99                                                               |
| Index ranges                                                 | -21 ≤ <i>h</i> ≤ 23, -6 ≤ <i>k</i> ≤ 6, -21 ≤ <i>l</i> ≤ 21                  |
| Reflections collected                                        | 11944                                                                        |
| Independent reflections                                      | 3064 [ <i>R</i> <sub>int</sub> = 0.1116, <i>R</i> <sub>sigma</sub> = 0.1082] |
| Data/restraints/parameters                                   | 3064/0/212                                                                   |
| Goodness-of-fit on <i>F</i> <sup>2</sup>                     | 0.965                                                                        |
| Final <i>R</i> indexes [ <i>I</i> ≥ 2 $\sigma$ ( <i>I</i> )] | <i>R</i> <sub>1</sub> = 0.0654, <i>wR</i> <sub>2</sub> = 0.1521              |
| Final <i>R</i> indexes [all data]                            | <i>R</i> <sub>1</sub> = 0.1125, <i>wR</i> <sub>2</sub> = 0.1691              |
| Largest diff. peak/hole / e Å <sup>-3</sup>                  | 0.49/-0.54                                                                   |
| CCDC number                                                  | 2386128                                                                      |

## VII. Computational data

All Density Functional Theory (DFT) calculations were performed at B3LYP/6-311+g(d,p) using Grimme's D3 dispersion correction with Becke-Johnson damping (DFT-D3(BJ)) employing an implicit solvation model (iefpcm) for benzene using the Gaussian 16 suite of quantum chemistry program. Quantum Theory of Atoms in Molecules (QTAIM) analyses to get an insight about the intramolecular H-bonding interactions were performed using Multiwfn3.7 programs.<sup>4,5</sup>

### Free Energy (in Hartrees)

| intermediate                 | <i>cis</i>   | <i>trans</i> |
|------------------------------|--------------|--------------|
| protonated proline <b>12</b> | -1453.056482 | -1453.046334 |
| proline <b>5</b>             | -1452.673372 | -1452.67546  |

### *cis*-18

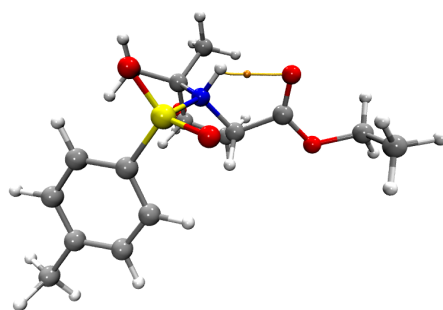

| Atom | x           | y           | z           |
|------|-------------|-------------|-------------|
| S1   | -0.43260800 | -0.43348000 | 1.64813500  |
| O2   | 3.26747100  | -1.10260300 | -1.17180600 |
| O3   | 0.41624800  | -1.60922100 | 1.68504500  |
| O4   | -0.73091800 | 0.37288600  | 2.81135800  |
| O5   | 3.24974200  | 0.05273000  | 0.77445300  |
| C6   | -1.86088800 | -0.72830600 | 0.66613000  |

<sup>4</sup> Frisch, M. J.; Trucks, G. W.; Schlegel, H. B.; Scuseria, G. E.; Robb, M. A.; Cheeseman, J. R.; Scalmani, G.; Barone, V.; Petersson, G. A.; Nakatsuji, H.; Li, X.; Caricato, M.; Marenich, A. V.; Bloino, J.; Janesko, B. G.; Gomperts, R.; Mennucci, B.; Hratchian, H. P.; Ortiz, J. V.; Izmaylov, A. F.; Sonnenberg, J. L.; Williams-Young, D.; Ding, F.; Lipparini, F.; Egidi, F.; Goings, J.; Peng, B.; Petrone, A.; Henderson, T.; Ranasinghe, D.; Zakrzewski, V. G.; Gao, J.; Rega, N.; Zheng, G.; Liang, W.; Hada, M.; Ehara, M.; Toyota, K.; Fukuda, R.; Hasegawa, J.; Ishida, M.; Nakajima, T.; Honda, Y.; Kitao, O.; Nakai, H.; Vreven, T.; Throssell, K.; Montgomery, Jr., J. A.; Peralta, J. E.; Ogliaro, F.; Bearpark, M. J.; Heyd, J. J.; Brothers, E. N.; Kudin, K. N.; Staroverov, V. N.; Keith, T. A.; Kobayashi, R.; Normand, J.; Raghavachari, K.; Rendell, A. P.; Burant, J. C.; Iyengar, S. S.; Tomasi, J.; Cossi, M.; Millam, J. M.; Klene, M.; Adamo, C.; Cammi, R.; Ochterski, J. W.; Martin, R. L.; Morokuma, K.; Farkas, O.; Foresman, J. B.; Fox, D. J. Gaussian 16, Revision C.01, Gaussian, Inc., Wallingford CT, 2016.

<sup>5</sup> (a) Lu, T.; Chen, F.; *J. Comput. Chem.* **2012**, *33*, 580-592, DOI: 10.1002/jcc.22885; (b) Emamian, S.; Lu, T.; Kruse, H.; Emamian, H. *J. Comput. Chem.* **2019**, *40*, 2868-2881, DOI: 10.1002/jcc.26068



| Atom | x           | y           | z           |
|------|-------------|-------------|-------------|
| C7   | 2.72283400  | -0.35561300 | -0.23685400 |
| C8   | -0.01286100 | 1.86701400  | -1.35887000 |
| H9   | -0.98281100 | 1.35874400  | -1.43526500 |
| C10  | 1.10466100  | 0.91514300  | -1.79937700 |
| H11  | 2.01155700  | 1.48461500  | -2.00363800 |
| H12  | 0.85171000  | 0.34328800  | -2.69038300 |
| C13  | 1.28006000  | -0.01190800 | -0.58697500 |
| H14  | 0.73364800  | -0.93986100 | -0.72729700 |
| C15  | 0.27266800  | 2.13977400  | 0.13413600  |
| C16  | -1.80827600 | -1.70613000 | -0.33218900 |
| H17  | -0.91489700 | -2.29519500 | -0.48834500 |
| C18  | -4.13702700 | -1.23949100 | -0.84372000 |
| C19  | -2.94765400 | -1.94127700 | -1.08648800 |
| H20  | -2.92189900 | -2.69667800 | -1.86230600 |
| C21  | -3.03578000 | -0.02805300 | 0.95208200  |
| H22  | -3.06820400 | 0.68339200  | 1.76541700  |
| C23  | -0.92850900 | 2.71200900  | 0.86728000  |
| H24  | -1.09489800 | 3.71237900  | 0.46586700  |
| H25  | -0.75342000 | 2.79376300  | 1.93869900  |
| H26  | -1.83277800 | 2.13620900  | 0.68937900  |
| C27  | 4.66609400  | -1.52524900 | -0.98079800 |
| H28  | 5.21334600  | -0.68522200 | -0.55550400 |
| H29  | 5.01078000  | -1.71479900 | -1.99481400 |
| C30  | -5.37538600 | -1.53255700 | -1.64045500 |
| H31  | -5.13146300 | -1.93682200 | -2.62348800 |
| H32  | -5.98737400 | -0.63813400 | -1.76708500 |
| H33  | -5.98613200 | -2.27629700 | -1.11812600 |
| H34  | -4.16306800 | -0.29268000 | 0.19099900  |
| H35  | -5.08251800 | 0.23689700  | 0.40928500  |
| C36  | 4.73404100  | -2.75976100 | -0.10757100 |
| H37  | 5.77412100  | -3.08655100 | -0.03487900 |
| H38  | 4.14984400  | -3.57493800 | -0.53870900 |
| H39  | 4.37211700  | -2.55108200 | 0.90004900  |
| C40  | 1.49265200  | 3.04380200  | 0.34189700  |
| H41  | 2.40144300  | 2.64592600  | -0.10834800 |
| H42  | 1.66995300  | 3.18801500  | 1.40966000  |
| H43  | 1.28796600  | 4.01278200  | -0.11078900 |
| O44  | -0.04167200 | 3.09901200  | -2.04136800 |
| H45  | -0.47579300 | 2.98965200  | -2.89364300 |
| H46  | 1.48774900  | 0.82318700  | 1.26442800  |
| N47  | 0.69733600  | 0.72566800  | 0.60040800  |

*trans-18*

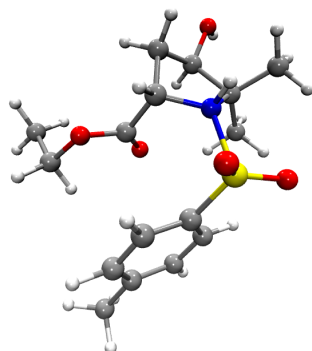

| <b>Atom</b> | <b>x</b>    | <b>y</b>    | <b>z</b>    |
|-------------|-------------|-------------|-------------|
| S1          | -0.40134600 | -1.92783300 | -0.90789800 |
| O2          | 0.82217300  | 2.14700800  | -1.11835600 |
| O3          | -1.01503200 | -2.99488200 | -0.14698800 |
| O4          | -0.41192800 | -1.87723600 | -2.35863900 |
| O5          | 0.28673000  | 1.27504300  | 0.89465000  |
| C6          | 1.15838600  | -1.46247300 | -0.27254200 |
| C7          | 0.07567500  | 1.43723200  | -0.28260100 |
| C8          | -2.81071400 | 1.21990800  | 0.73564800  |
| H9          | -2.19711400 | 1.65160200  | 1.52791900  |
| C10         | -2.37996300 | 1.77982600  | -0.62227100 |
| H11         | -2.15049900 | 2.84388000  | -0.58397800 |
| H12         | -3.18394200 | 1.63321500  | -1.34738600 |
| C13         | -1.16432800 | 0.93307800  | -1.01734400 |
| H14         | -0.97450800 | 0.91029800  | -2.08713500 |
| C15         | -2.51801600 | -0.33000300 | 0.69299100  |
| C16         | 1.47287000  | -1.76298000 | 1.05443200  |
| H17         | 0.76405600  | -2.27431700 | 1.68939500  |
| C18         | 3.64842500  | -0.74242600 | 0.70453100  |
| C19         | 2.71978300  | -1.39490300 | 1.52967600  |
| H20         | 2.98113800  | -1.61771500 | 2.55685600  |
| C21         | 2.05931000  | -0.82491300 | -1.13053800 |
| H22         | 1.79668200  | -0.62377500 | -2.16014900 |
| C23         | -3.76360900 | -1.16552800 | 0.41827800  |
| H24         | -4.43360900 | -1.10425500 | 1.27472100  |
| H25         | -3.48624300 | -2.21126400 | 0.27590500  |
| H26         | -4.31852300 | -0.80747500 | -0.45198400 |
| C27         | 1.96938700  | 2.86346900  | -0.55079300 |
| H28         | 2.65578900  | 2.95191600  | -1.39058300 |
| H29         | 2.40989200  | 2.23453700  | 0.22097100  |
| C30         | 5.00544500  | -0.37121100 | 1.22813500  |
| H31         | 4.98094300  | -0.18893700 | 2.30326500  |
| H32         | 5.39741400  | 0.51494200  | 0.72657500  |
| H33         | 5.71070000  | -1.18938400 | 1.04796800  |
| C34         | 3.30039800  | -0.47124700 | -0.62643900 |
| H35         | 4.01294100  | 0.02169900  | -1.27647500 |
| C36         | 1.54264700  | 4.21368100  | -0.01376700 |
| H37         | 2.42248100  | 4.74724500  | 0.35377500  |

| H38         | 0.84357300  | 4.10298600  | 0.81713100  |
|-------------|-------------|-------------|-------------|
| <b>Atom</b> | <b>x</b>    | <b>y</b>    | <b>z</b>    |
| H39         | 1.07981700  | 4.81799000  | -0.79608400 |
| C40         | -1.81103200 | -0.80132200 | 1.95704000  |
| H41         | -0.86067200 | -0.29287500 | 2.09868000  |
| H42         | -1.67309800 | -1.88145100 | 1.96085400  |
| H43         | -2.45943300 | -0.55177400 | 2.80040700  |
| O44         | -4.17231500 | 1.52642900  | 0.93889900  |
| H45         | -4.35199600 | 1.61273600  | 1.88068500  |
| H46         | -2.28088000 | -0.71066700 | -1.32347200 |
| N47         | -1.62405300 | -0.43940600 | -0.58494700 |

*cis-5*

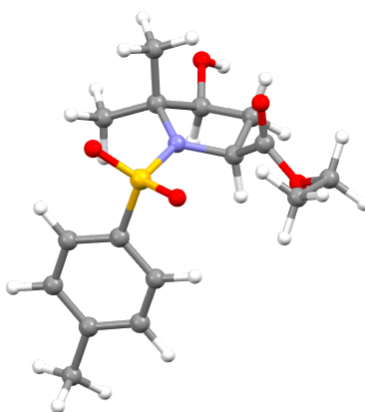

| <b>Atom</b> | <b>x</b>    | <b>y</b>    | <b>z</b>    |
|-------------|-------------|-------------|-------------|
| S1          | -0.22567900 | -0.25517900 | 1.25805700  |
| O2          | 2.55045200  | -1.90243900 | -1.09341400 |
| O3          | 0.46780600  | -1.54513900 | 1.22453300  |
| O4          | -0.42510700 | 0.47122600  | 2.51031700  |
| O5          | 3.33419900  | -0.40850600 | 0.41075000  |
| N6          | 0.61364900  | 0.72509500  | 0.22438200  |
| C7          | -1.83983400 | -0.53023000 | 0.52811800  |
| C8          | 2.52186900  | -0.74861100 | -0.41302500 |
| C9          | 0.90733300  | 2.45731000  | -1.29200400 |
| H10         | -0.02003800 | 2.32003100  | -1.86197300 |
| C11         | 1.89807800  | 1.35271500  | -1.65299000 |
| H12         | 2.88716300  | 1.62639100  | -1.28334600 |
| H13         | 1.96074400  | 1.16307300  | -2.72474400 |
| C14         | 1.36413600  | 0.12670800  | -0.89078300 |
| H15         | 0.70807100  | -0.47247900 | -1.52550000 |
| C16         | 0.57543500  | 2.22095200  | 0.20097700  |
| C17         | -1.95878900 | -1.43731200 | -0.52430300 |
| H18         | -1.09947700 | -2.00790600 | -0.85163600 |
| C19         | -4.32883400 | -0.92167700 | -0.67670000 |
| C20         | -3.20000200 | -1.62006300 | -1.12262700 |
| H21         | -3.29622800 | -2.32474500 | -1.94128700 |
| C22         | -2.94618300 | 0.16976000  | 0.99808600  |

|             |             |             |             |
|-------------|-------------|-------------|-------------|
| H23         | -2.83819800 | 0.85264800  | 1.82966800  |
| C24         | -0.79213300 | 2.81914800  | 0.52508400  |
| <b>Atom</b> | <b>x</b>    | <b>y</b>    | <b>z</b>    |
| H25         | -0.74859300 | 3.88917200  | 0.31165600  |
| H26         | -1.04778400 | 2.68750100  | 1.57521600  |
| H27         | -1.57612000 | 2.37732200  | -0.09246200 |
| C28         | 3.58547500  | -2.85623100 | -0.72450400 |
| H29         | 4.50885300  | -2.30908100 | -0.53340900 |
| H30         | 3.70597900  | -3.47390800 | -1.61385200 |
| C31         | -5.67661800 | -1.15734000 | -1.30653900 |
| H32         | -5.58493800 | -1.36879000 | -2.37391000 |
| H33         | -6.33104600 | -0.29299300 | -1.18029900 |
| H34         | -6.17168800 | -2.01705800 | -0.84307700 |
| C35         | -4.18240000 | -0.03173600 | 0.39260800  |
| H36         | -5.04744900 | 0.50905600  | 0.76007800  |
| C37         | 3.15819400  | -3.67381700 | 0.48000500  |
| H38         | 3.93143500  | -4.41204100 | 0.71006200  |
| H39         | 2.22356200  | -4.20088900 | 0.27854900  |
| H40         | 3.01434500  | -3.03484400 | 1.35147900  |
| C41         | 1.64776400  | 2.77658200  | 1.14214000  |
| H42         | 2.62674000  | 2.35277700  | 0.91751900  |
| H43         | 1.39047400  | 2.50519700  | 2.16687700  |
| H44         | 1.70166900  | 3.86288400  | 1.05852900  |
| O45         | 1.40073900  | 3.77472200  | -1.47694200 |
| H46         | 1.39218900  | 3.98000000  | -2.41692400 |

*trans-5*

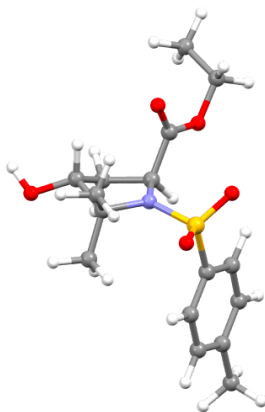

|             |             |             |             |
|-------------|-------------|-------------|-------------|
| <b>Atom</b> | <b>x</b>    | <b>y</b>    | <b>z</b>    |
| S1          | -0.52095200 | 0.22867600  | 1.51188000  |
| O2          | 2.28758300  | -2.22384100 | -0.23667500 |
| O3          | 0.09392500  | -0.96918900 | 2.08777400  |
| O4          | -0.89588800 | 1.36866500  | 2.34590300  |
| O5          | 3.20253300  | -0.34307300 | 0.61867900  |
| N6          | 0.53913400  | 0.77710400  | 0.36105600  |
| C7          | -1.98813500 | -0.33183000 | 0.64465500  |
| C8          | 2.31341600  | -0.91084600 | 0.03203800  |

|             |             |             |             |
|-------------|-------------|-------------|-------------|
| C9          | 1.77996100  | 1.99091300  | -1.19018500 |
| H10         | 2.75352000  | 1.96175600  | -0.69507800 |
| C11         | 1.47607700  | 0.62113200  | -1.79376200 |
| <b>Atom</b> | <b>x</b>    | <b>y</b>    | <b>z</b>    |
| H12         | 2.31858700  | 0.20016400  | -2.34379700 |
| H13         | 0.62406900  | 0.70039400  | -2.47143600 |
| C14         | 1.09040900  | -0.21908500 | -0.56658200 |
| H15         | 0.35406000  | -0.97898300 | -0.82724800 |
| C16         | 0.70096700  | 2.19551600  | -0.09021100 |
| C17         | -2.04030000 | -1.64031300 | 0.16771300  |
| H18         | -1.22960100 | -2.32570800 | 0.37670900  |
| C19         | -4.23119400 | -1.19063800 | -0.78271700 |
| C20         | -3.15848800 | -2.05671700 | -0.54841500 |
| H21         | -3.20068800 | -3.07390900 | -0.92163500 |
| C22         | -3.04812500 | 0.54735600  | 0.43655100  |
| H23         | -3.00760400 | 1.54968200  | 0.83995900  |
| C24         | -0.59271700 | 2.77448600  | -0.66884900 |
| H25         | -0.38786600 | 3.74415700  | -1.12240100 |
| H26         | -1.32223100 | 2.91436700  | 0.12861100  |
| H27         | -1.02563000 | 2.12171300  | -1.42903400 |
| C28         | 3.41530700  | -3.01717600 | 0.22740400  |
| H29         | 3.00713500  | -4.02193200 | 0.32761600  |
| H30         | 3.71433600  | -2.64774300 | 1.20794600  |
| C31         | -5.45444100 | -1.65879600 | -1.52632200 |
| H32         | -5.89335700 | -0.85165900 | -2.11647300 |
| H33         | -6.22018300 | -2.00604100 | -0.82486900 |
| H34         | -5.21966700 | -2.48840000 | -2.19555800 |
| C35         | -4.15988400 | 0.11224100  | -0.27405400 |
| H36         | -4.98859000 | 0.79357600  | -0.43200500 |
| C37         | 4.56196700  | -2.97258600 | -0.76520700 |
| H38         | 5.36685200  | -3.62825900 | -0.42239900 |
| H39         | 4.96188200  | -1.96122500 | -0.85419700 |
| H40         | 4.23707100  | -3.31637700 | -1.74998900 |
| C41         | 1.25212400  | 3.08707600  | 1.02166800  |
| H42         | 2.12127400  | 2.61673500  | 1.48489900  |
| H43         | 0.50289100  | 3.26821300  | 1.79015700  |
| H44         | 1.55355600  | 4.04433600  | 0.58780600  |
| O45         | 1.73860300  | 3.05544400  | -2.13125200 |
| H46         | 2.62577700  | 3.19814100  | -2.47282400 |
